# Supplementary material for: 2-Phenyl-4,4,5,5-tetramethylimidazoline-1-oxyl 3-oxide Radical (PTIO•) Trapping Activity and Mechanisms of 16 Phenolic Xanthones
Source: MDPI journal article supplement (doi:10.3390/molecules23071692), 2018-07-11
Supplement: s1 [file s1]

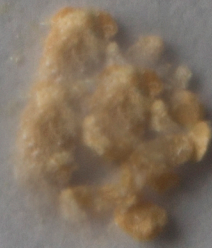

Garcinone C

产品分析证书  
Certificate of Analysis

中文名称: 1,3,6,7-四羟基-8-(3-羟基-3-甲基丁基)-2-(3-甲基-2-丁烯-1-基)-9H-占吨-9-酮

English Name: Garcinone C

别名 (Alias):

产品编码 (Cat. No.): BP0622

CAS Number: 76996-27-5

分子式 (M. F.): C<sub>23</sub>H<sub>26</sub>O<sub>7</sub>

分子量 (M. W.): 414.454

批号 (Batch No.): PRF7082941

报告日期 (Report date): 2016/8/30

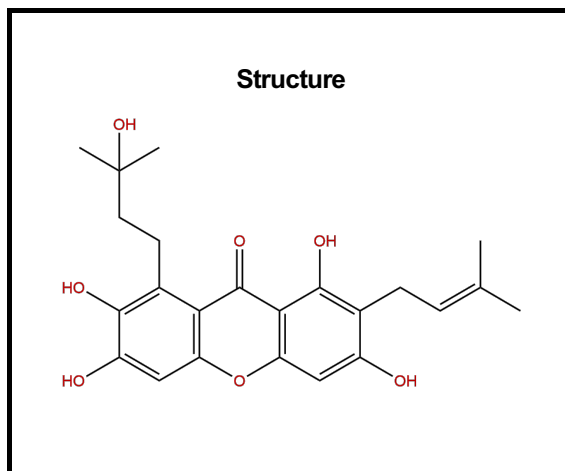

检验结果 (Analytical result):

| 检验项目 (Test Item)             | 检验指标 (Specifications)     | 检验结果 (Results)      |
|------------------------------|---------------------------|---------------------|
| 外观 Appearance                | Light yellow powder       | Light yellow powder |
| 干燥失重 Loss on drying          | <3.0%                     | 1.8 %               |
| 纯度 Purity (HPLC-DAD, 260nm)* | ≥98.0%                    | 99.37%              |
| 质谱 Mass                      | 516.5±1                   | Conforms            |
| 核磁 NMR                       | Comply with the structure | Conforms            |

\* 色谱图见附件 (Please find HPLC chromatography attached.)

贮存条件 (Storage): 2~8℃

复测期 (Retest date): two years (2018-08-29) under conditions list above.

备注 (Remarks): 如遇质量问题, 请于收到产品之日起 15 日内与我们联系。

In case of quality issue, please contact us within 15 days after receipt of the product.

QC:

Zhang Ling

Date: 2016年8月30日

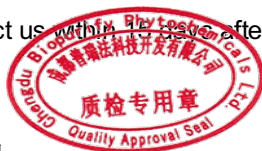

QA:

Wu Qi

Date: 2016年8月30日

Tel: +86-28-82633987 Fax: +86-28-82633165

http://www.biopurify.com Email: sales@biopurify.com biopurify@gmail.com

# SAMPLE INFORMATION

|                   |                        |                     |              |
|-------------------|------------------------|---------------------|--------------|
| Sample Name:      | Garcinone C PRF7082941 | Acquired By:        | System       |
| Sample Type:      | Unknown                | Sample Set Name:    |              |
| Vial:             | 8                      | Acq. Method Set:    | Garcinone C  |
| Injection #:      | 1                      | Processing Method:  | sample       |
| Injection Volume: | 10.00 ul               | Channel Name:       | 260.0nm      |
| Run Time:         | 25.0 Minutes           | Proc. Chnl. Descr.: | PDA 260.0 nm |
| Date Acquired:    | 2016-8-30 9:45:01 CST  |                     |              |
| Date Processed:   | 2016-8-30 10:18:55 CST |                     |              |

## Auto-Scaled Chromatogram

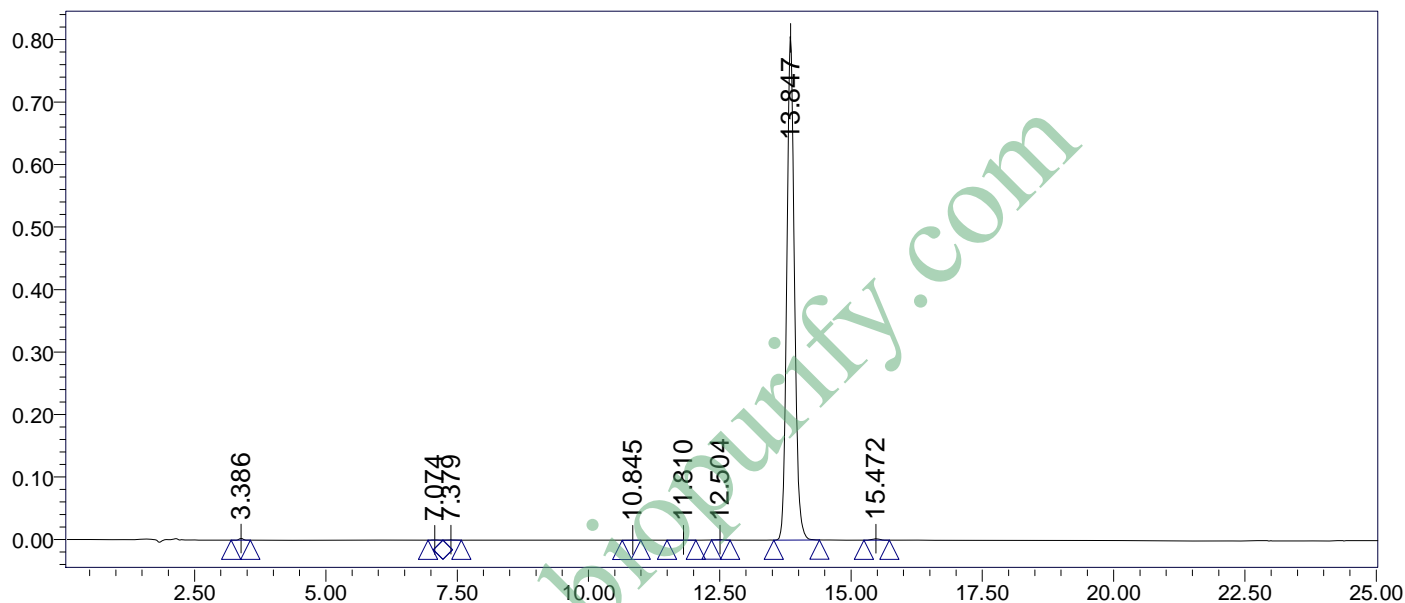

## Peak Results

|   | RT     | Area    | % Area | USP Plate Count | USP Resolution |
|---|--------|---------|--------|-----------------|----------------|
| 1 | 3.386  | 14628   | 0.18   | 9423.50         |                |
| 2 | 7.074  | 2027    | 0.02   | 22153.42        | 21.95          |
| 3 | 7.379  | 2780    | 0.03   | 22601.43        | 1.58           |
| 4 | 10.845 | 3679    | 0.04   | 33250.35        | 15.85          |
| 5 | 11.810 | 2603    | 0.03   | 19893.46        | 3.46           |
| 6 | 12.504 | 5233    | 0.06   | 36647.86        | 2.40           |
| 7 | 13.847 | 8169091 | 99.37  | 43920.63        | 5.04           |
| 8 | 15.472 | 21040   | 0.26   | 52958.57        | 5.96           |
