# Supplementary material for: 2-Phenyl-4,4,5,5-tetramethylimidazoline-1-oxyl 3-oxide Radical (PTIO•) Trapping Activity and Mechanisms of 16 Phenolic Xanthones
Source: MDPI journal article supplement (doi:10.3390/molecules23071692), 2018-07-11

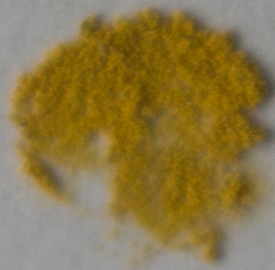

1,2,5-Trihydroxyxanthone

## CERTIFICATE OF ANALYSIS

**BBP No.:** BBP04821

**CAS No.:** 156640-23-2

**Chemical Name:** 1,2,5-Trihydroxyxanthone

**Molecular Formula:** C<sub>13</sub>H<sub>8</sub>O<sub>5</sub>

**Structure:**

**Purity:** 98%

**Appearance:** Yellow powder

**Solvent:** Dimethyl sulfoxide, methanol

**Exact Weight:** 5.1 mg

**Storage:** Store in a dark place under the temperature of 0-4 °C

**Intended Use:** For laboratory use only

**Reference:** H. Minami, Phytochemistry, 1994, 36(2), 501-506

**Warm Notice:** When publishing, please cite as: **chemical name** was purchased from BioBioPha Co., Ltd. (Kunming, China)

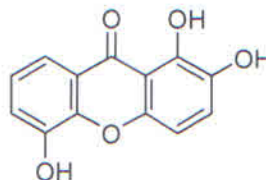

### Characterization Data Summary

| Analytical Test                           | Results                             |
|-------------------------------------------|-------------------------------------|
| Identification by <sup>1</sup> H-NMR      | Consistent with the above structure |
| Purity tested by HPLC, <sup>1</sup> H-NMR | 98%                                 |

**Authorized Signature:**

**Date:**

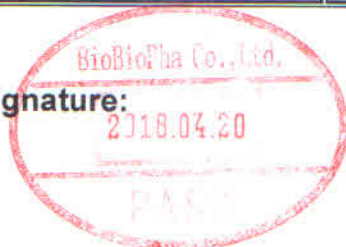



## PRODUCT QUALITY REPORT

Product Number: BBP04821

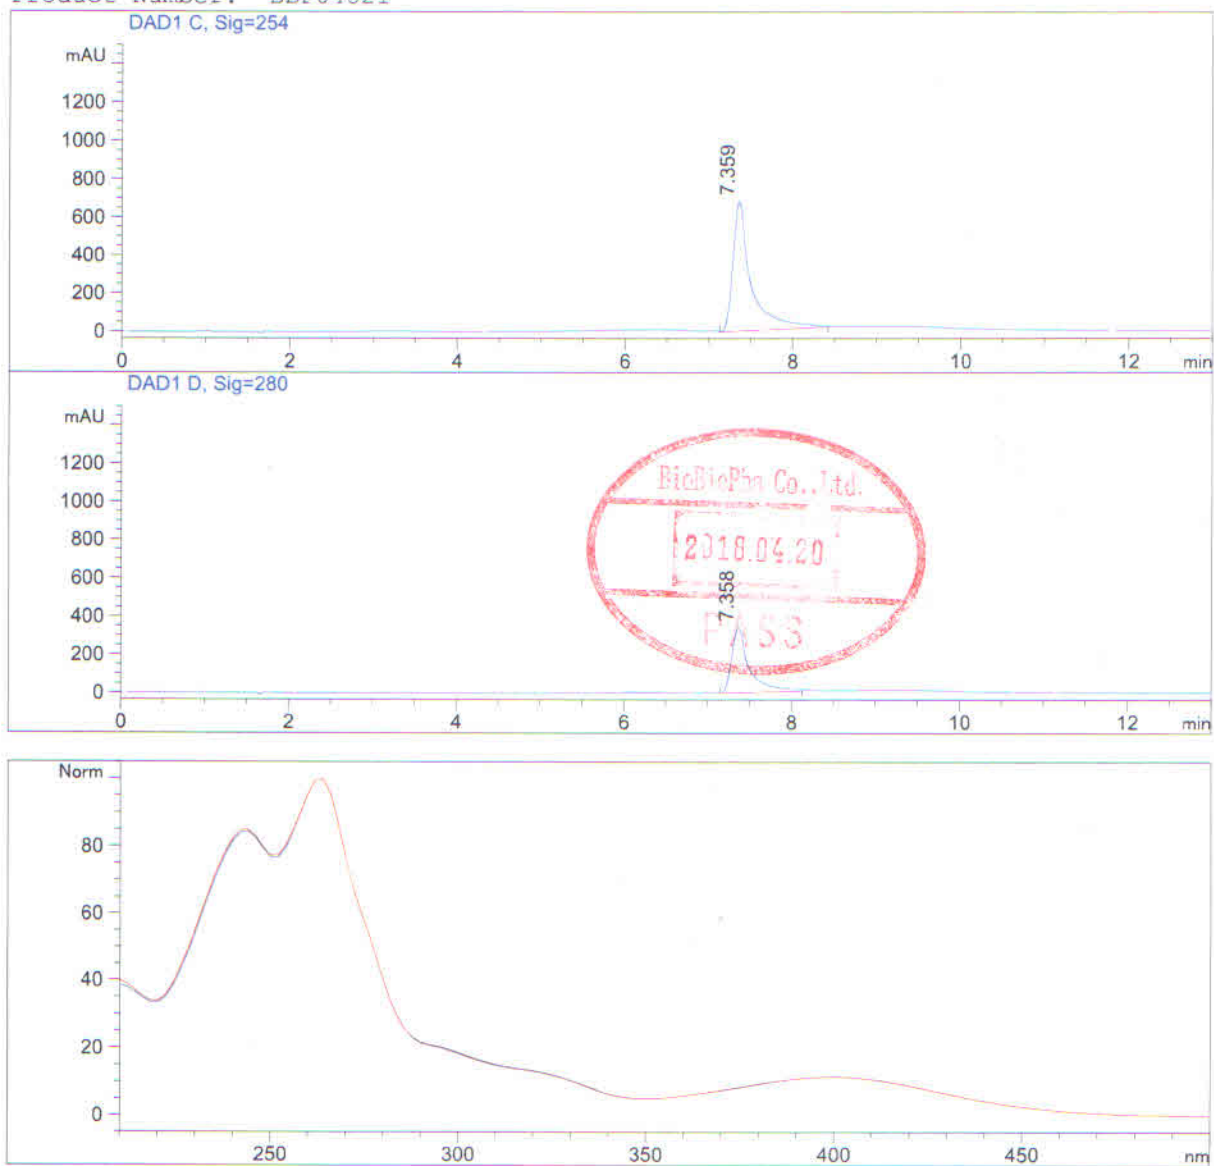

Agilent 1200 series HPLC system

Thermo Hypersil BDS C18 column (5  $\mu$ m, 4.6  $\times$  150 mm)

20% $\rightarrow$ 100% MeOH in H<sub>2</sub>O over 8.0 min followed by 100% MeOH to 13.0 min

1.0 ml/min, 20°C

DMSO-d<sub>6</sub>, 400 MHz

—12.498

—10.565

—9.420

7.586  
7.567  
7.338  
7.329  
7.315  
7.264  
7.245  
7.225  
6.995  
6.973

—2.490

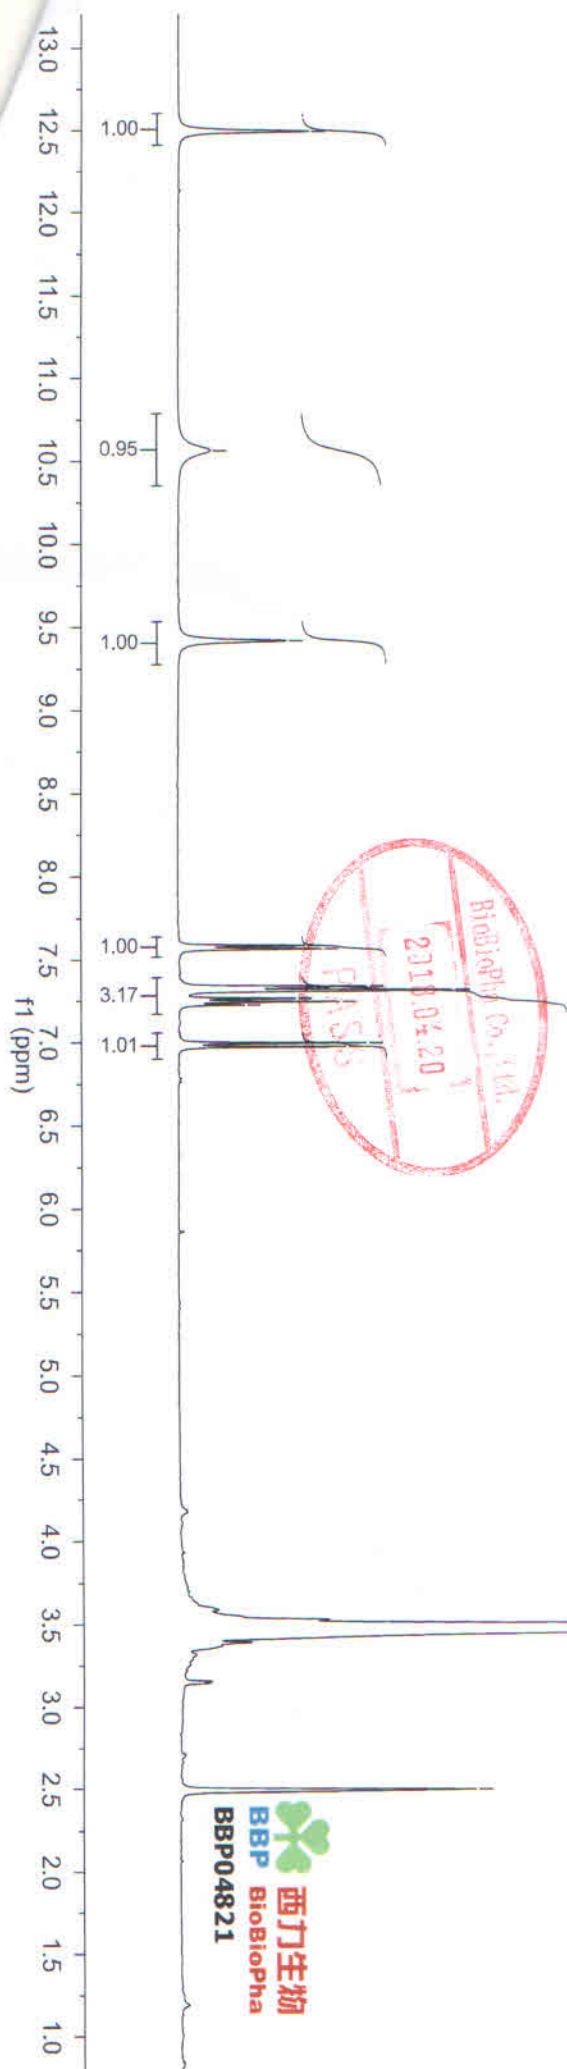

Supplement: s1 [file s1]
