# Supplementary material for: 2-Phenyl-4,4,5,5-tetramethylimidazoline-1-oxyl 3-oxide Radical (PTIO•) Trapping Activity and Mechanisms of 16 Phenolic Xanthones
Source: MDPI journal article supplement (doi:10.3390/molecules23071692), 2018-07-11

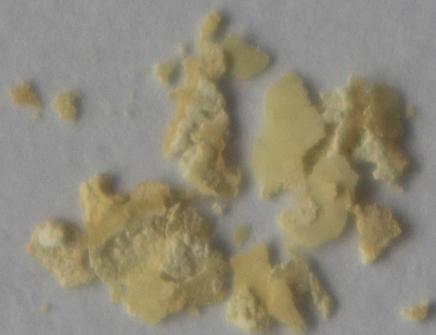

1,3,5,6-Tetrahydroxyxanthone

## CERTIFICATE OF ANALYSIS

**BBP No.:** BBP05036

**CAS No.:** 5084-31-1

**Chemical Name:** 1,3,5,6-Tetrahydroxyxanthone

**Molecular Formula:** C<sub>13</sub>H<sub>8</sub>O<sub>6</sub>

**Structure:**

**Purity:** 98%

**Appearance:** Yellow powder

**Solvent:** Methanol, acetone

**Exact Weight:** 5.1 mg

**Storage:** Store in a dark place under the temperature of 0-4 °C

**Intended Use:** For laboratory use only

**Reference:** W. Li, Food Sci Biotechnol, 2013, 22(4), 945-949

**Warm Notice:** When publishing, please cite as: chemical name was purchased from BioBioPha Co., Ltd. (Kunming, China)

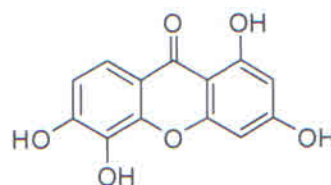

### Characterization Data Summary

| Analytical Test                           | Results                             |
|-------------------------------------------|-------------------------------------|
| Identification by <sup>1</sup> H-NMR      | Consistent with the above structure |
| Purity tested by HPLC, <sup>1</sup> H-NMR | 98%                                 |

**Authorized Signature:**

**Date:**





## PRODUCT QUALITY REPORT

Product Number: BBP05036

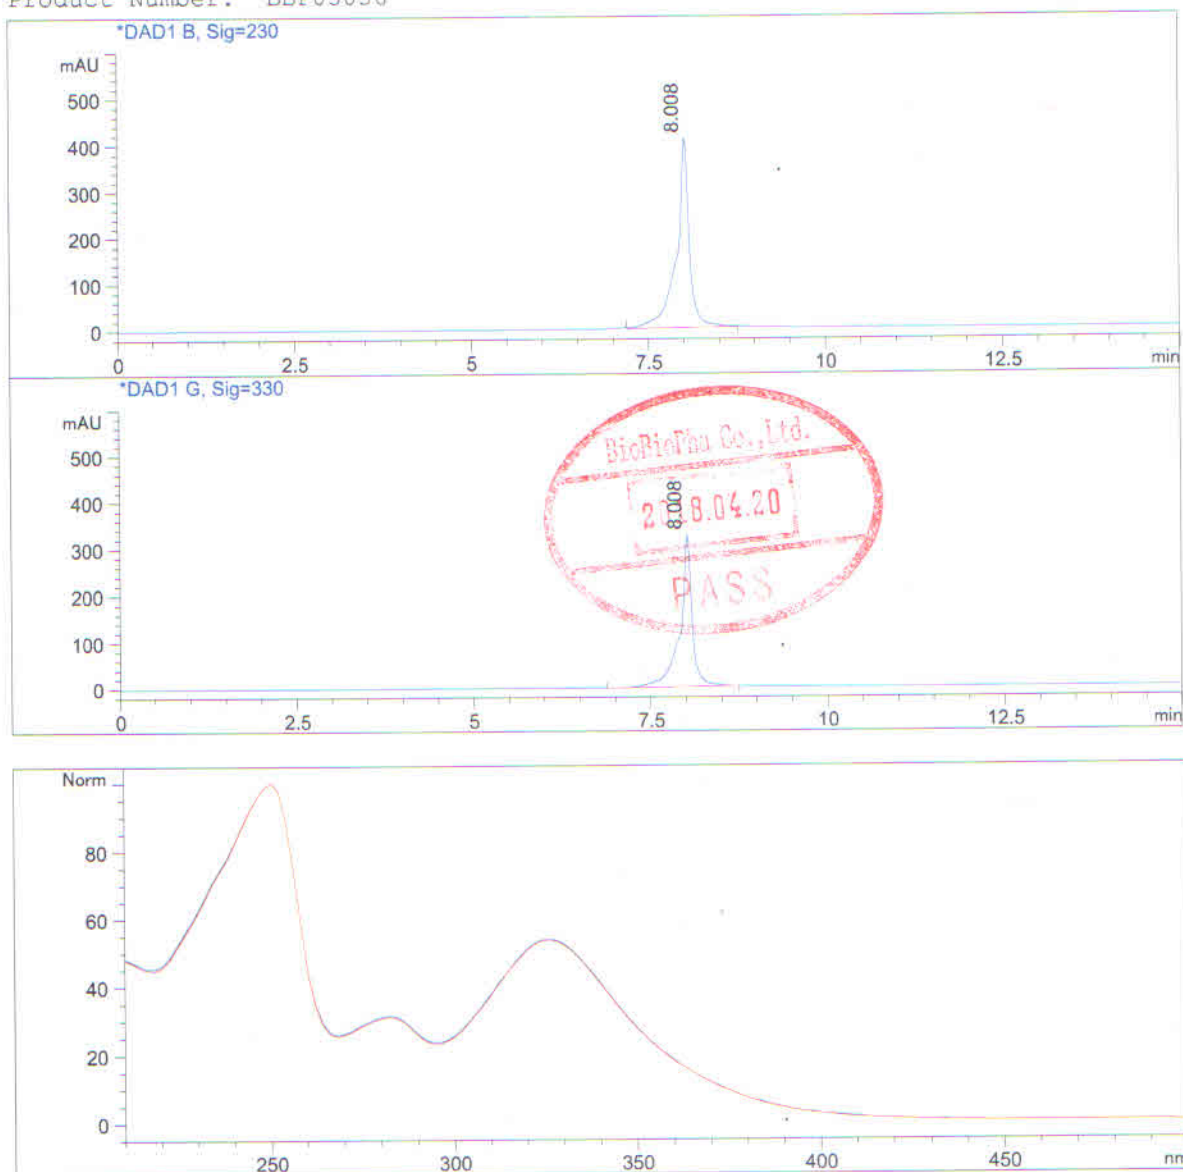

Agilent 1200 series HPLC system  
Thermo Hypersil BDS C18 column (5  $\mu$ m, 4.6  $\times$  150 mm)  
20% $\rightarrow$ 100% MeOH in H<sub>2</sub>O over 8.0 min followed by 100% MeOH to 15.0 min  
1.0 ml/min, 20°C

CD<sub>3</sub>OD, 500 MHz

7.580  
7.563

6.878  
6.860

6.430  
6.426

6.164  
6.160

3.300

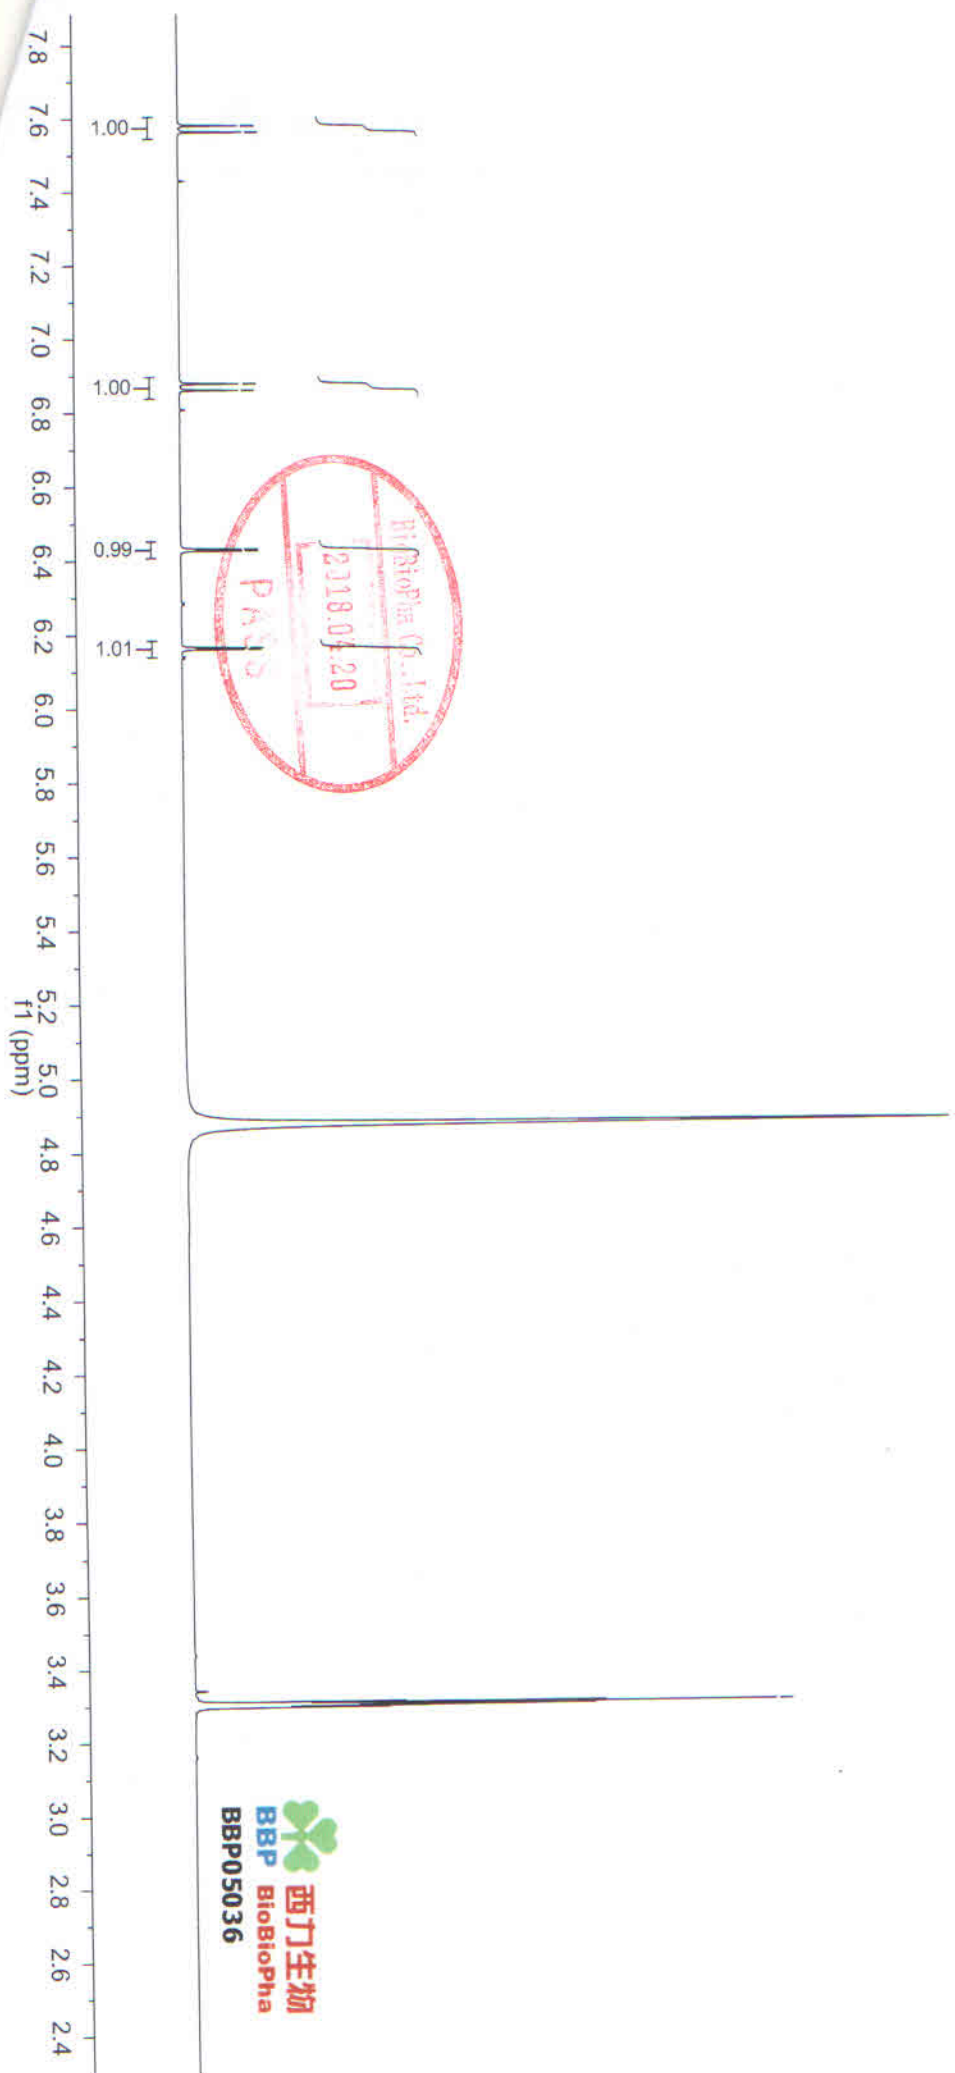

Supplement: s1 [file s1]
