# Supplementary material for: 2-Phenyl-4,4,5,5-tetramethylimidazoline-1-oxyl 3-oxide Radical (PTIO•) Trapping Activity and Mechanisms of 16 Phenolic Xanthones
Source: MDPI journal article supplement (doi:10.3390/molecules23071692), 2018-07-11
Supplement: s1 [file s1]

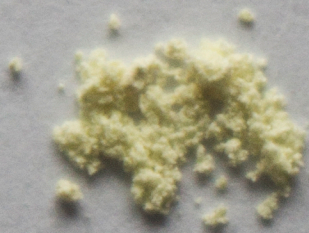

Neomangiferin

产品分析证书  
Certificate of Analysis

中文名称: 新芒果苷

English Name: Neomangiferin

别名 (Alias):

产品编码 (Cat. No.): BP0993

CAS Number: 64809-67-2

分子式 (M. F.): C<sub>25</sub>H<sub>28</sub>O<sub>16</sub>

分子量 (M. W.): 584.483

批号 (Batch No.): PRF7080245

报告日期 (Report date): 2016/8/2

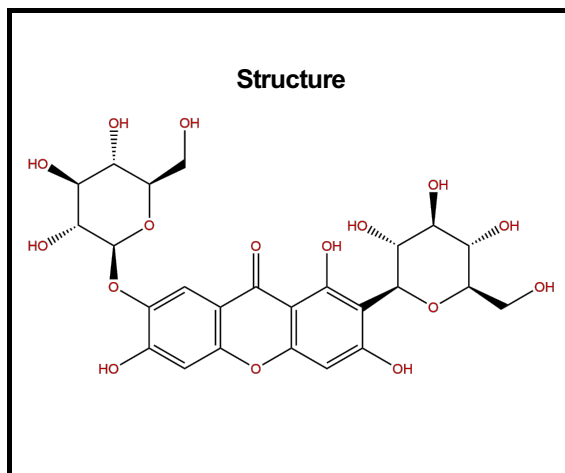

检验结果 (Analytical result):

| 检验项目 (Test Item)             | 检验指标 (Specifications)     | 检验结果 (Results)      |
|------------------------------|---------------------------|---------------------|
| 外观 Appearance                | Light yellow powder       | Light yellow powder |
| 干燥失重 Loss on drying          | <3.0%                     | 1.6%                |
| 纯度 Purity (HPLC-DAD, 255nm)* | ≥98.0%                    | 99.01%              |
| 质谱 Mass                      | 584.483±1                 | Conforms            |
| 核磁 NMR                       | Comply with the structure | Conforms            |

\* 色谱图见附件 (Please find HPLC chromatography attached.)

贮存条件 (Storage): 类白色粉末

复测期 (Retest date): two years (2018-08-01) under conditions list above.

备注 (Remarks): 如遇质量问题, 请于收到产品之日起 15 日内与我们联系。

In case of quality issue, please contact us within 15 days after receipt of the product.

QC: Zhang Ling

Date: 2016年8月2日

QA: Wu Qi

Date: 2016年8月2日



# SAMPLE INFORMATION

|                   |                          |                     |               |
|-------------------|--------------------------|---------------------|---------------|
| Sample Name:      | Neomangiferin PRF7080245 | Acquired By:        | System        |
| Sample Type:      | Unknown                  | Sample Set Name:    |               |
| Vial:             | 75                       | Acq. Method Set:    | Neomangiferin |
| Injection #:      | 1                        | Processing Method:  | Samples       |
| Injection Volume: | 5.00 ul                  | Channel Name:       | 255.0nm       |
| Run Time:         | 25.0 Minutes             | Proc. Chnl. Descr.: | PDA 255.0 nm  |
| Date Acquired:    | 2016-8-2 16:42:17 CST    |                     |               |
| Date Processed:   | 2016-8-2 9:44:24 CST     |                     |               |

## Auto-Scaled Chromatogram

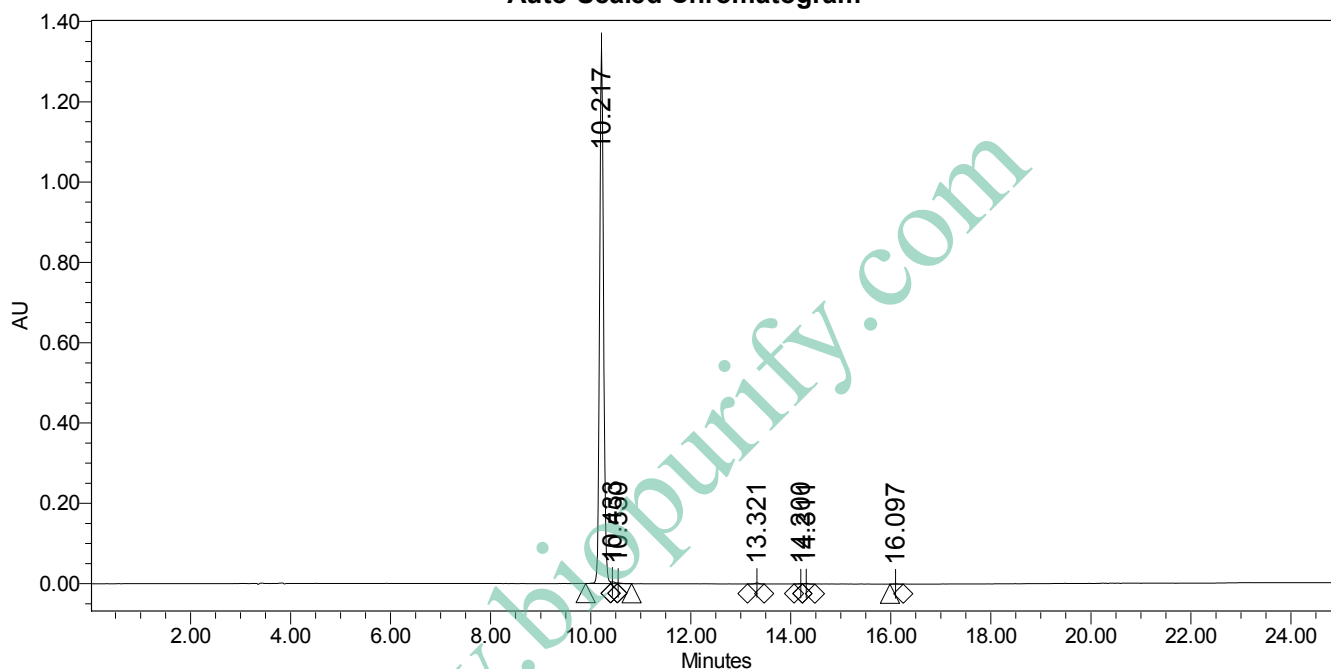

## Peak Results

|   | Name | RT     | Area    | % Area | USP Plate Count | USP Resolution |
|---|------|--------|---------|--------|-----------------|----------------|
| 1 |      | 10.217 | 7293532 | 99.01  | 76268.34        |                |
| 2 |      | 10.433 | 24893   | 0.34   |                 | 1.47           |
| 3 |      | 10.550 | 9685    | 0.13   |                 |                |
| 4 |      | 13.321 | 15027   | 0.20   | 107962.87       |                |
| 5 |      | 14.200 | 5541    | 0.08   |                 | 5.53           |
| 6 |      | 14.311 | 12321   | 0.17   | 121672.54       | 0.61           |
| 7 |      | 16.097 | 5290    | 0.07   | 177997.19       | 10.11          |
