# Supplementary material for: 2-Phenyl-4,4,5,5-tetramethylimidazoline-1-oxyl 3-oxide Radical (PTIO•) Trapping Activity and Mechanisms of 16 Phenolic Xanthones
Source: MDPI journal article supplement (doi:10.3390/molecules23071692), 2018-07-11
Supplement: s1 [file s1]

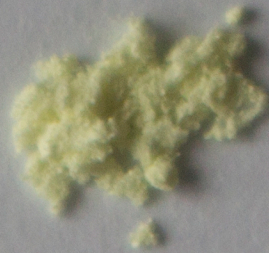

Mangiferin

产品分析证书  
Certificate of Analysis

中文名称: 芒果苷

English Name: Mangiferin

别名 (Alias): Euxanthogen; Chinomine; Alpizarin;  
Hedysaride; Mannipherin; Chedisaride; Shamimin

CAS Number: 4773-96-0

分子式 (M. F.): C<sub>19</sub>H<sub>18</sub>O<sub>11</sub>

分子量 (M. W.): 422.342

批号 (Batch No.): PRF7090142

报告日期 (Report date): 2016/9/1

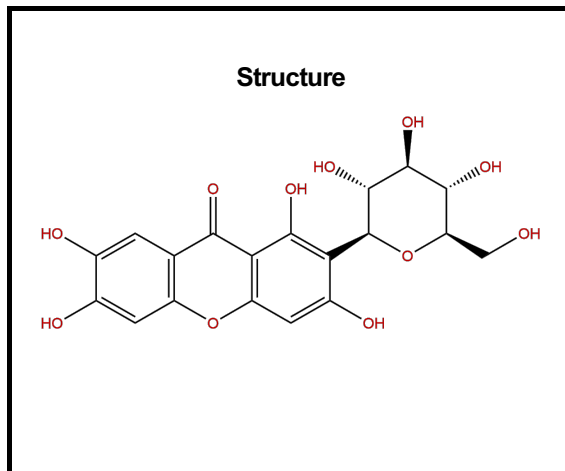

## 检验结果 (Analytical result):

| 检验项目 (Test Item)            | 检验指标 (Specifications)     | 检验结果 (Results)      |
|-----------------------------|---------------------------|---------------------|
| 外观Appearance                | Light yellow powder       | Light yellow powder |
| 干燥失重Loss on drying          | <3.0%                     | 0.82 %              |
| 纯度Purity (HPLC-DAD, 257nm)* | ≥98.0%                    | 99.91%              |
| 质谱Mass                      | 422.342±1                 | Conforms            |
| 核磁NMR                       | Comply with the structure | Conforms            |

\* 色谱图见附件 (Please find HPLC chromatography attached.)

贮存条件 (Storage): 2~8℃

复测期 (Retest date): two years (2018-08-31) under conditions list above.

备注 (Remarks): 如遇质量问题, 请于收到产品之日起 15 日内与我们联系。

In case of quality issue, please contact us within 15 days after receipt of the product.

QC:

Zhang Ling

Date: 2016年9月1日

QA:

Wu Qi

Date: 2016年9月1日

## SAMPLE INFORMATION

|                   |                       |                     |              |
|-------------------|-----------------------|---------------------|--------------|
| Sample Name:      | Mangiferin PRF7090142 | Acquired By:        | System       |
| Sample Type:      | Unknown               | Sample Set Name:    |              |
| Vial:             | 43                    | Acq. Method Set:    | Mangiferin   |
| Injection #:      | 1                     | Processing Method:  | Samples      |
| Injection Volume: | 5.00 ul               | Channel Name:       | 257.0nm      |
| Run Time:         | 20.0 Minutes          | Proc. Chnl. Descr.: | PDA 257.0 nm |
|                   |                       |                     |              |
| Date Acquired:    | 2016-9-1 11:01:30 CST |                     |              |
| Date Processed:   | 2016-9-1 12:48:03 CST |                     |              |

### Auto-Scaled Chromatogram

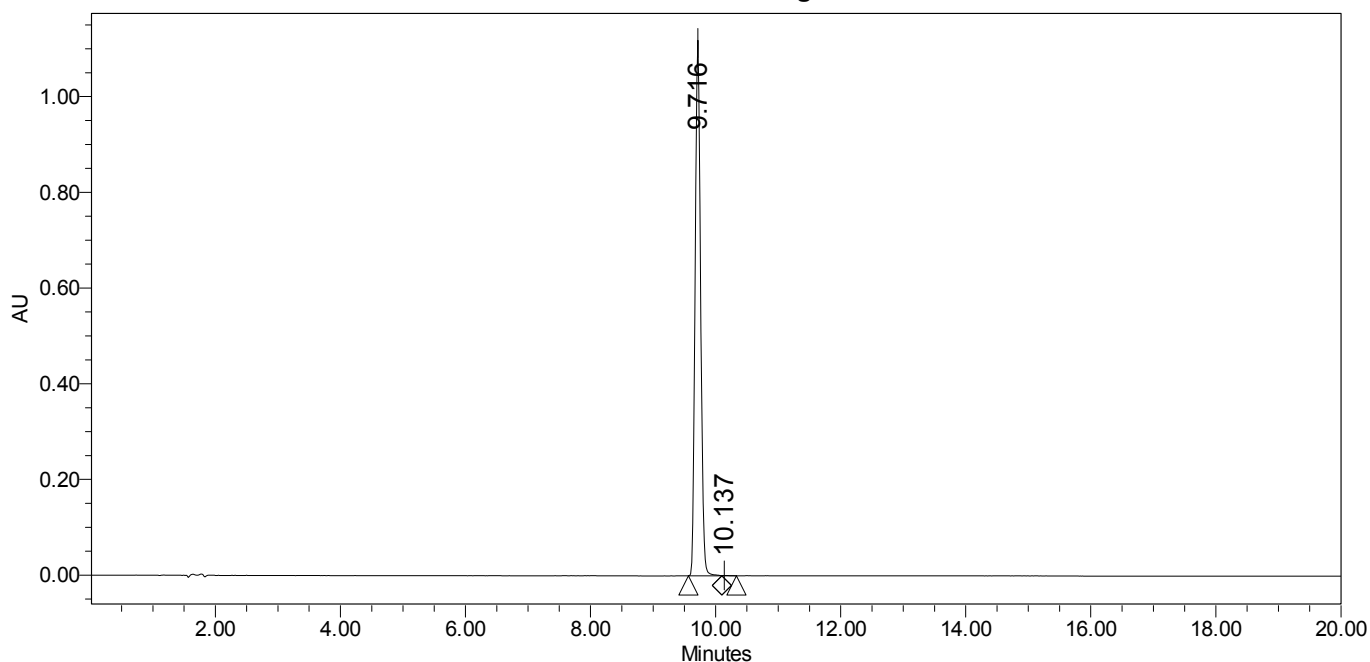

### Peak Results

|   | Name | RT     | Area    | % Area | USP Plate Count | USP Resolution |
|---|------|--------|---------|--------|-----------------|----------------|
| 1 |      | 9.716  | 6852966 | 99.91  | 55365.11        |                |
| 2 |      | 10.137 | 5953    | 0.09   |                 | 2.53           |
