# Supplementary material for: 2-Phenyl-4,4,5,5-tetramethylimidazoline-1-oxyl 3-oxide Radical (PTIO•) Trapping Activity and Mechanisms of 16 Phenolic Xanthones
Source: MDPI journal article supplement (doi:10.3390/molecules23071692), 2018-07-11

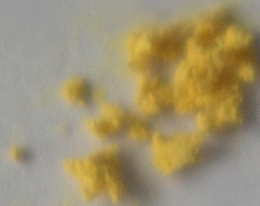

Isojacarebuin

## CERTIFICATE OF ANALYSIS

**BBP No.:** BBP03640

**CAS No.:** 50597-93-8

**Chemical Name:** Isojacareubin

**Molecular Formula:** C<sub>18</sub>H<sub>14</sub>O<sub>6</sub>

**Structure:**

**Purity:** 97%

**Appearance:** Orange powder

**Solvent:** Dimethyl sulfoxide, methanol

**Exact Weight:** 5.1 mg

**Storage:** Store in a dark place under the temperature of 0-4 °C

**Intended Use:** For laboratory use only

**Reference:** Q. L. Wu, Phytochemistry, 1998, 49(5), 1395-1402

**Warm Notice:** When publishing, please cite as: **chemical name** was purchased from BioBioPha Co., Ltd. (Kunming, China)

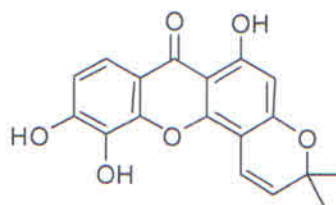

### Characterization Data Summary

| Analytical Test                           | Results                             |
|-------------------------------------------|-------------------------------------|
| Identification by <sup>1</sup> H-NMR      | Consistent with the above structure |
| Purity tested by HPLC, <sup>1</sup> H-NMR | 97%                                 |

**Authorized Signature:**

**Date:**

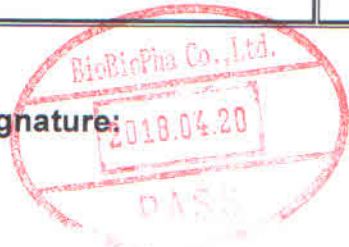



## PRODUCT QUALITY REPORT

Product Number: BBP03640

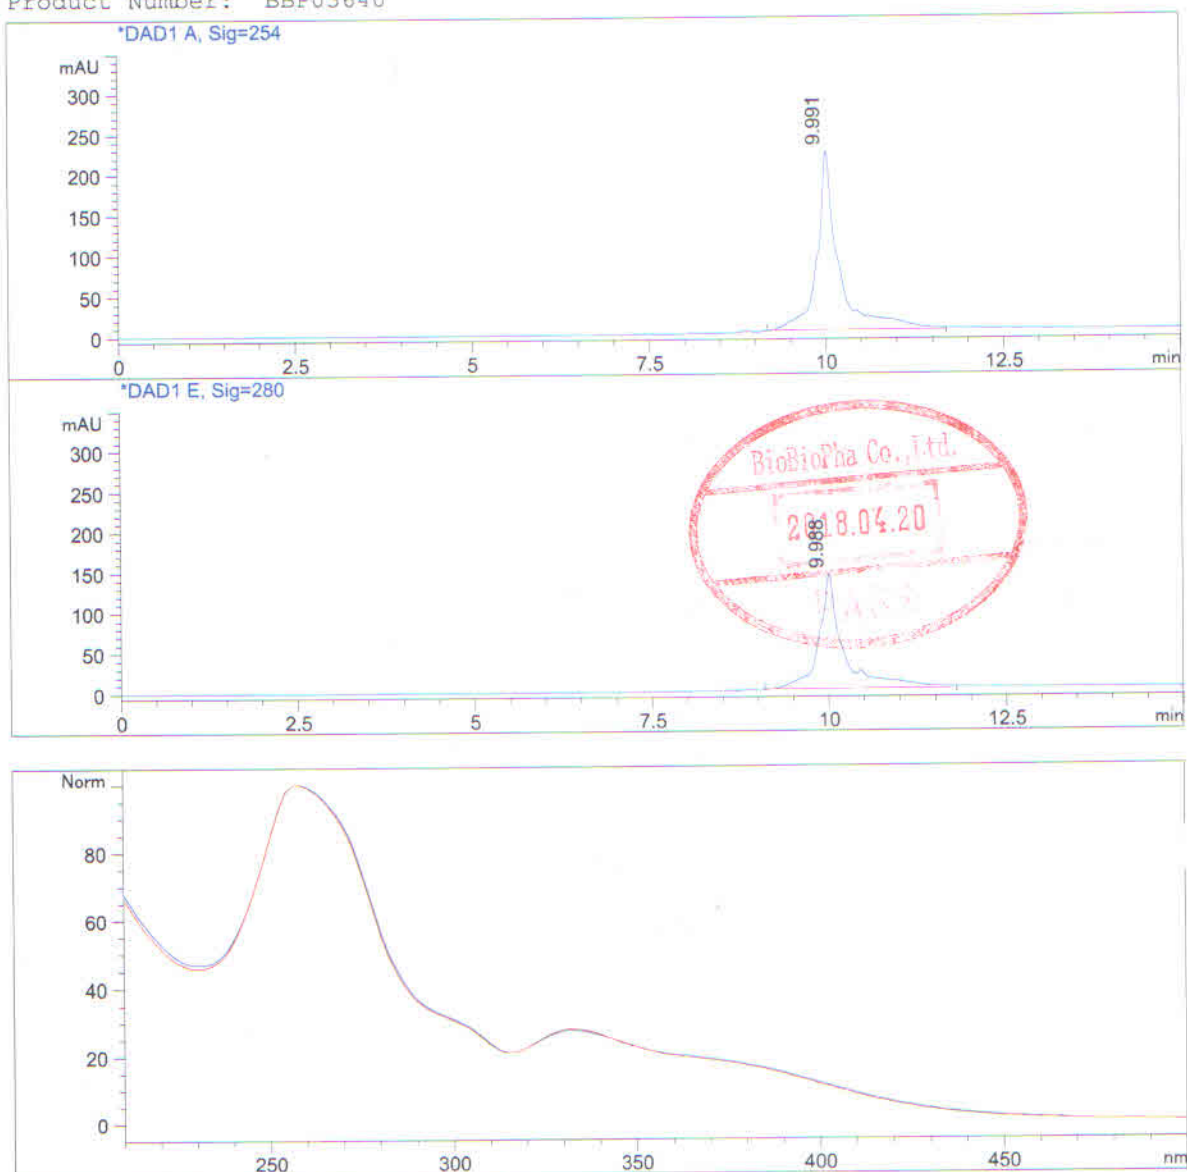

Agilent 1200 series HPLC system

InertSustain C18 column (5  $\mu$ m, 4.6  $\times$  150 mm)

20%  $\rightarrow$  100% MeOH in H<sub>2</sub>O over 8.0 min followed by 100% MeOH to 15.0 min

1.0 ml/min, 20°C

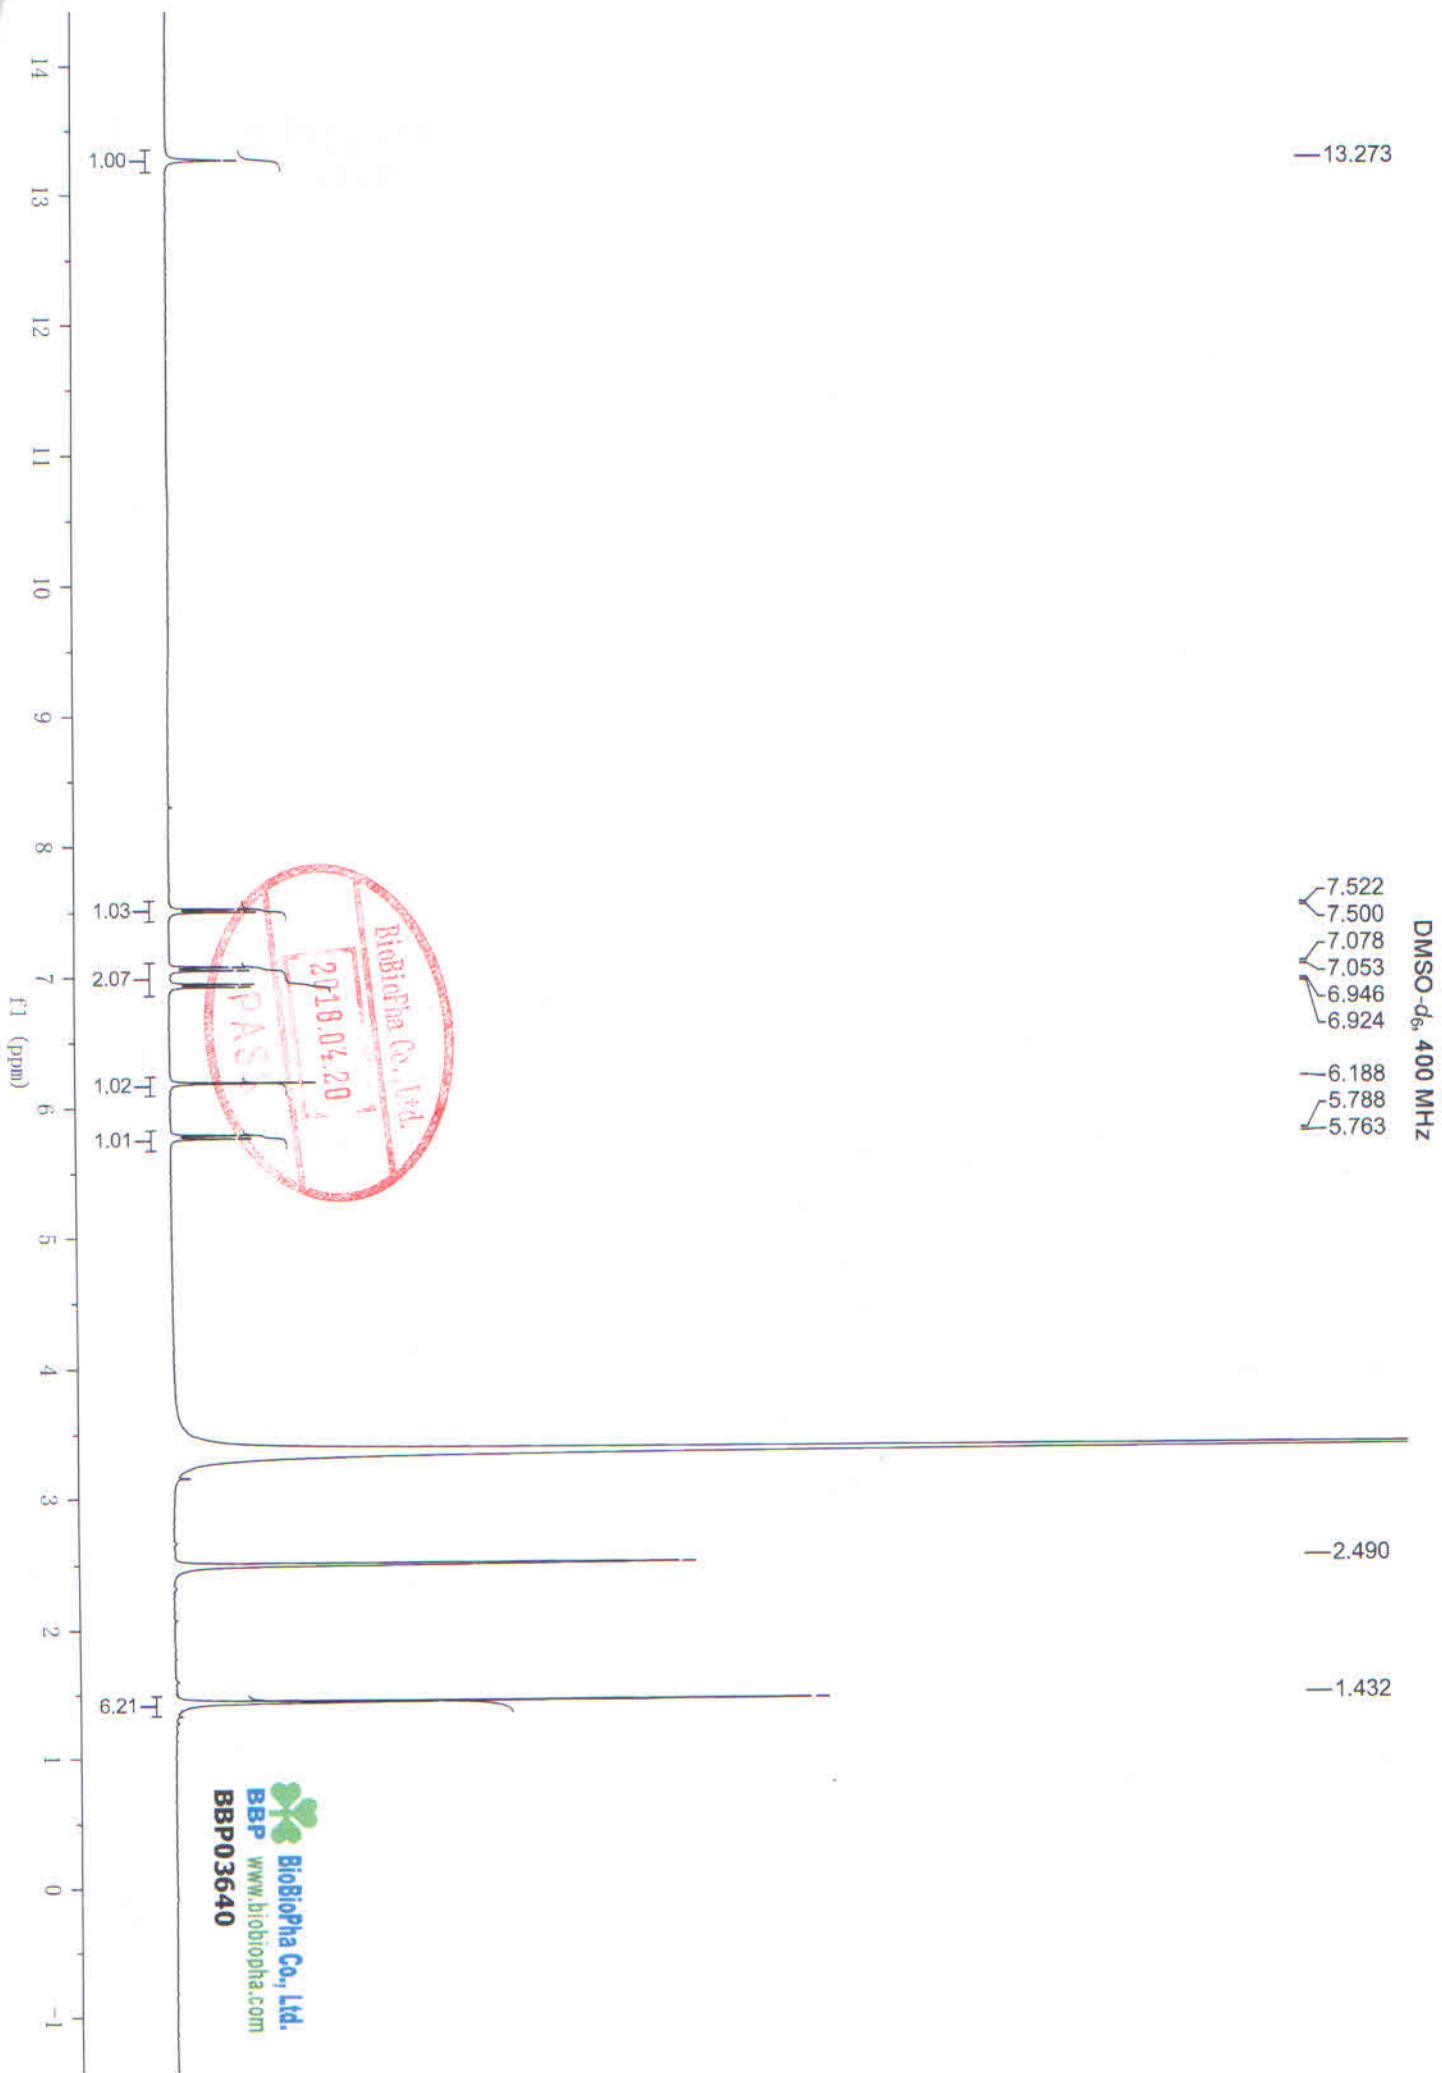

Supplement: s1 [file s1]
