# Supplementary material for: 2-Phenyl-4,4,5,5-tetramethylimidazoline-1-oxyl 3-oxide Radical (PTIO•) Trapping Activity and Mechanisms of 16 Phenolic Xanthones
Source: MDPI journal article supplement (doi:10.3390/molecules23071692), 2018-07-11
Supplement: s1 [file s1]

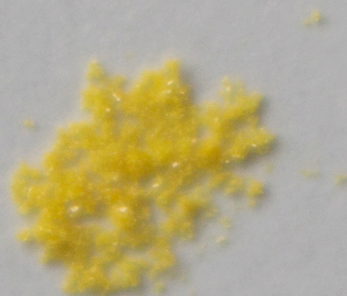

γ-Mangostin

## 产品分析证书

# Certificate of Analysis

中文名:  $\gamma$ -倒捻子素

English Name: Gamma-mangostin

别名(Alias): Normangostin

### Structure

### 产品图片

产品编码(Cat. No.): BP0614

CAS Number: 31271-07-5

分子式(M. F.):  $C_{23}H_{24}O_6$

分子量(M. W.): 396.439

批号(Batch No.): PRF7012601

报告日期(Report date): 2016-01-26

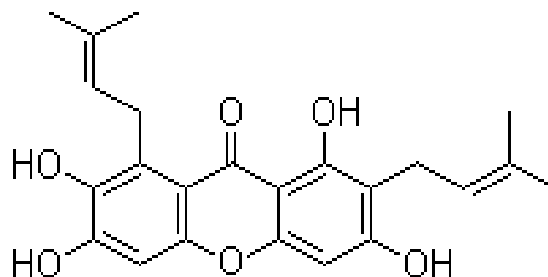

### 检验结果 (Analytical result):

| 检验项目 (Test Item)            | 检验指标 (Specifications)     | 检验结果 (Results) |
|-----------------------------|---------------------------|----------------|
| 外观Appearance                | Yellow powder             | Yellow powder  |
| 干燥失重Loss on drying          | <3.0%                     | 0.36%          |
| 纯度Purity (HPLC-DAD, 317nm)* | $\geq 98.0\%$             | 98.9%          |
| 质谱Mass                      | 396.439 $\pm$ 1.0         | Conforms       |
| 核磁NMR                       | Comply with the structure | Conforms       |
| 结论 (Conclusion)             | 合格 (Qualified)            |                |

\* 色谱图见附件 (Please find HPLC chromatography attached.)

包装 (Package): 棕色螺口玻璃瓶 (Brown vial)

贮存条件 (Storage): 避光密闭保存于阴凉干燥处。长期保存建议-20℃。

Cool and Dry place, protected from light, keep package airproofed when not in use.

Please store in -20℃ for long term storage

复测期 (Retest date): two years (2018-01-25) under conditions list above.

备注 (Remarks): 如遇质量问题, 请于收到产品之日起 15 日内与我们联系。

In case of quality issue, please contact us within 15 days after receipt of the product.

QC:

Zhang Ling

QA:

Wu Qi

Date: 2016-01-26

Date: 2016-01-26



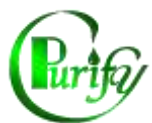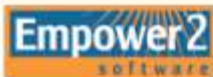

Chengdu Biopurify Phytochemicals Ltd.

### SAMPLE INFORMATION

|                   |                        |                     |              |
|-------------------|------------------------|---------------------|--------------|
| Sample Name:      | γ Mangostin PRF7012601 | Acquired By:        | System       |
| Sample Type:      | Unknown                | Sample Set Name:    |              |
| Vial:             | 57                     | Acq. Method Set:    | γ Mangostin  |
| Injection #:      | 1                      | Processing Method:  | Samples      |
| Injection Volume: | 10.00 ul               | Channel Name:       | 317.0nm      |
| Run Time:         | 25.0 Minutes           | Proc. Chnl. Descr.: | PDA 317.0 nm |
| Date Acquired:    | 2016-1-26 15:46:41 CST |                     |              |
| Date Processed:   | 2016-1-26 16:12:55 CST |                     |              |

### Auto-Scaled Chromatogram

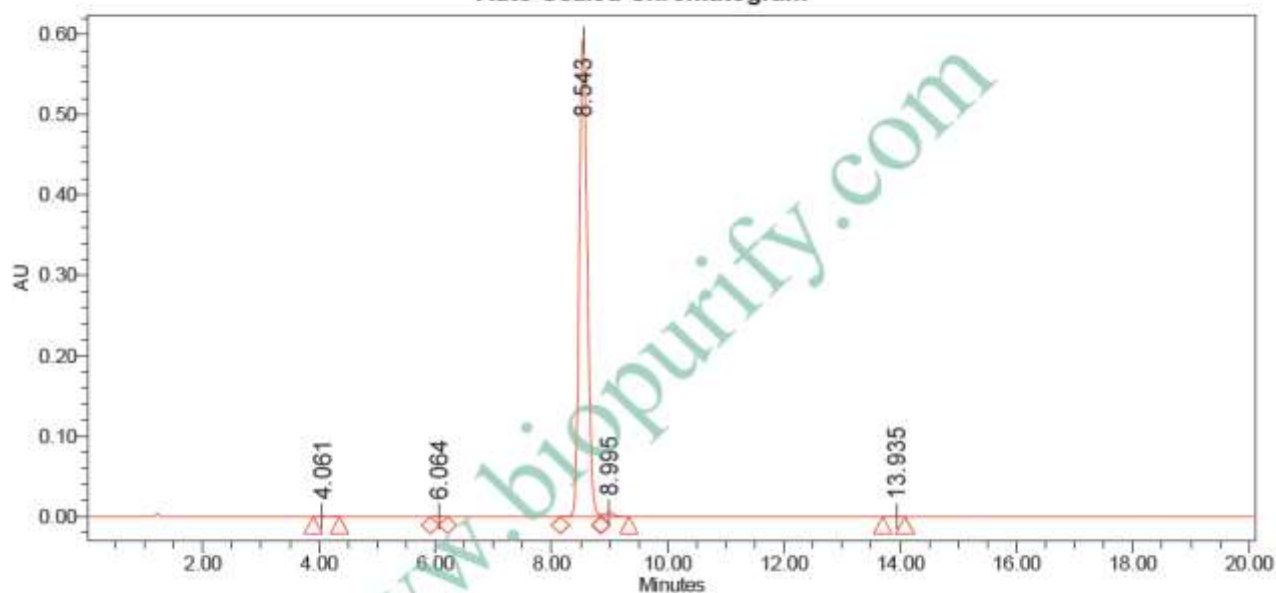

### Peak Results

|   | Name | RT     | Area    | % Area | USP Plate Count | USP Resolution |
|---|------|--------|---------|--------|-----------------|----------------|
| 1 |      | 4.061  | 2673    | 0.05   | 11714.49        |                |
| 2 |      | 6.064  | 4545    | 0.08   | 10003.88        | 10.15          |
| 3 |      | 8.543  | 5700161 | 98.86  | 18194.41        | 9.93           |
| 4 |      | 8.995  | 55922   | 0.97   | 14324.21        | 1.55           |
| 5 |      | 13.935 | 2657    | 0.05   | 36258.55        | 16.57          |

Reported by User: System  
Report Method: Chengdu  
Report Method ID: 10505  
Page: 1 of 1

Project Name: 2016  
Date Printed:  
2016-1-26  
17:11:00 PRC
