# Supplementary material for: 2-Phenyl-4,4,5,5-tetramethylimidazoline-1-oxyl 3-oxide Radical (PTIO•) Trapping Activity and Mechanisms of 16 Phenolic Xanthones
Source: MDPI journal article supplement (doi:10.3390/molecules23071692), 2018-07-11
Supplement: s1 [file s1]

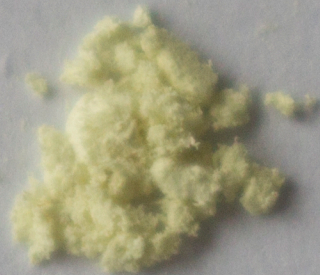

Isomangiferin

产品分析证书  
Certificate of Analysis

中文名称: 异芒果苷

English Name: Isomangiferin

别名 (Alias): 4-Glucosyl-1,3,6,7-tetrahydroxyxanthone

CAS Number: 24699-16-9

分子式 (M. F.): C<sub>19</sub>H<sub>18</sub>O<sub>11</sub>

分子量 (M. W.): 422.342

批号 (Batch No.): PRF7082943

报告日期 (Report date): 2016/8/29

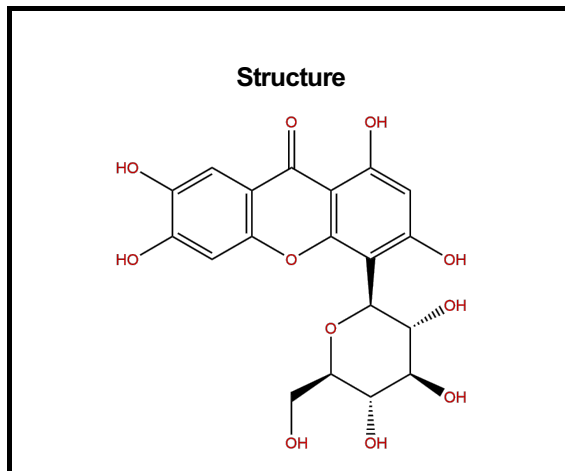

## 检验结果 (Analytical result):

| 检验项目 (Test Item)             | 检验指标 (Specifications)     | 检验结果 (Results)      |
|------------------------------|---------------------------|---------------------|
| 外观 Appearance                | Light yellow powder       | Light yellow powder |
| 干燥失重 Loss on drying          | <3.0%                     | 1.3 %               |
| 纯度 Purity (HPLC-DAD, 316nm)* | ≥98.0%                    | 99.77%              |
| 质谱 Mass                      | 422.342±1                 | Conforms            |
| 核磁 NMR                       | Comply with the structure | Conforms            |

\* 色谱图见附件 (Please find HPLC chromatography attached.)

贮存条件 (Storage): 2~8℃

复测期 (Retest date): two years (2018-08-28) under conditions list above.

备注 (Remarks): 如遇质量问题, 请于收到产品之日起 15 日内与我们联系。

In case of quality issue, please contact us within 15 days after receipt of the product.

QC: Zhang Ling

Date: 2016年8月29日

QA: Wu Qi

Date: 2016年8月29日

## SAMPLE INFORMATION

|                   |                          |                     |               |
|-------------------|--------------------------|---------------------|---------------|
| Sample Name:      | Isomangiferin PRF7082943 | Acquired By:        | System        |
| Sample Type:      | Unknown                  | Sample Set Name:    |               |
| Vial:             | 70                       | Acq. Method Set:    | Isomangiferin |
| Injection #:      | 1                        | Processing Method:  | sample        |
| Injection Volume: | 5.00 ul                  | Channel Name:       | 316.0nm       |
| Run Time:         | 22.0 Minutes             | Proc. Chnl. Descr.: | PDA 316.0 nm  |
|                   |                          |                     |               |
| Date Acquired:    | 2016-8-29 15:55:35 CST   |                     |               |
| Date Processed:   | 2016-8-29 16:19:57 CST   |                     |               |

### Auto-Scaled Chromatogram

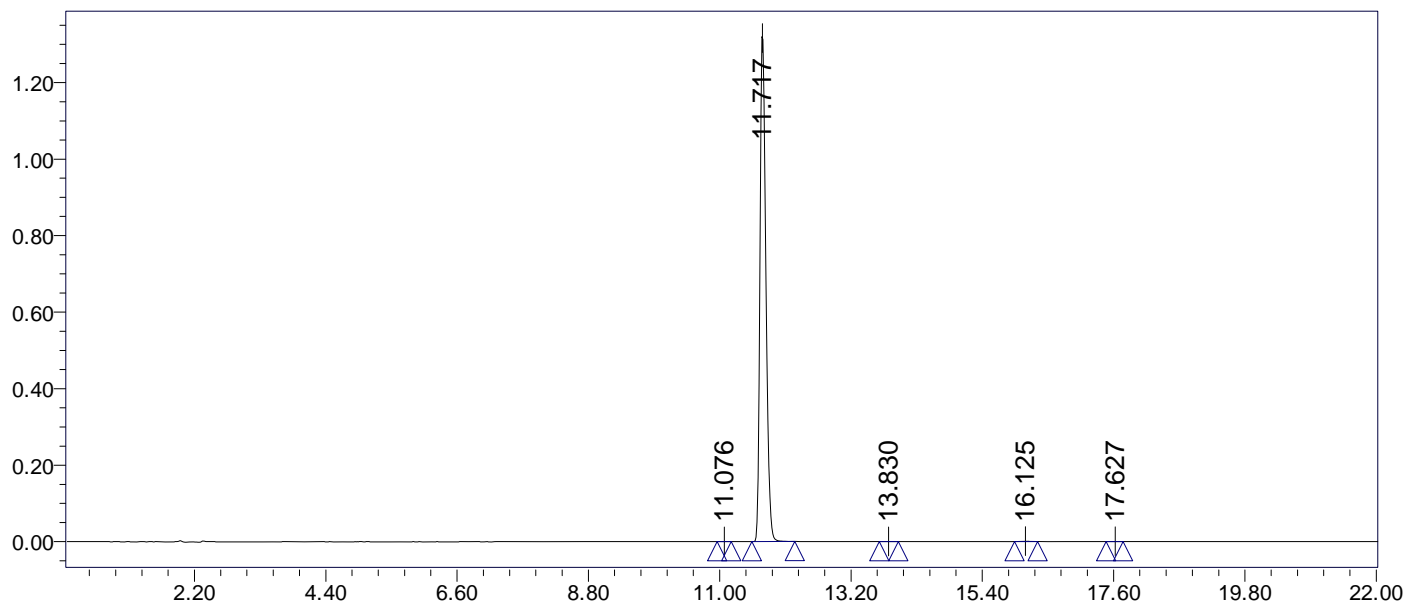

### Peak Results

|   | RT     | Area    | % Area | USP Plate Count | USP Resolution |
|---|--------|---------|--------|-----------------|----------------|
| 1 | 11.076 | 2130    | 0.02   | 76463.85        |                |
| 2 | 11.717 | 9192060 | 99.77  | 63981.30        | 3.60           |
| 3 | 13.830 | 3650    | 0.04   | 69207.66        | 10.39          |
| 4 | 16.125 | 10732   | 0.12   | 131642.98       | 11.50          |
| 5 | 17.627 | 4606    | 0.05   | 188484.35       | 8.64           |
