# Supplementary material for: 2-Phenyl-4,4,5,5-tetramethylimidazoline-1-oxyl 3-oxide Radical (PTIO•) Trapping Activity and Mechanisms of 16 Phenolic Xanthones
Source: MDPI journal article supplement (doi:10.3390/molecules23071692), 2018-07-11
Supplement: s1 [file s1]

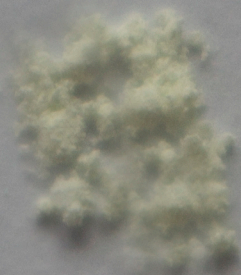

7-O-Methylmangiferin

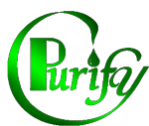

成都普瑞法科技开发有限公司  
Chengdu Biopurify Phytochemicals Ltd.

Add: No.11 Building, No. 388 Rongtaidadao CNSTP  
Wenjiang Zone, Chengdu, Sichuan, 611130 China  
TEL: 028-82633987 FAX: 028-82633165  
E-mail: biopurify@gmail.com sales@biopurify.com  
Web: www.biopurify.com

## Certificate of Analysis

**Product Name: 7-O-Methylmangiferin**

**Other Name:**

**Catalogue No.:** BP1566

**Batch No.:** PRF7060808

**Reported Date:** 2016-06-08

**CAS Number:** 31002-12-7

**Mol. Formula:** C<sub>20</sub>H<sub>20</sub>O<sub>11</sub>

**Mol. Weight:** 436.369

**Analysis Method of Purity:** HPLC-DAD

**Structure:**

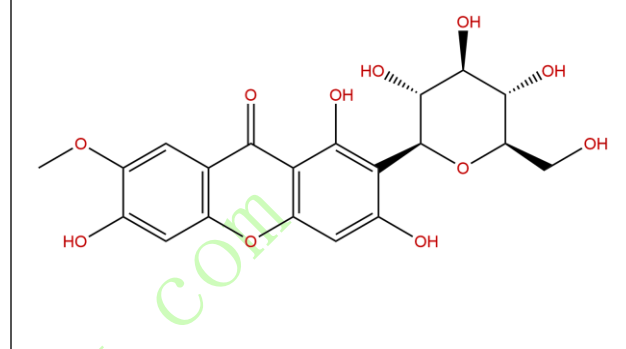

**Analytical result:**

| Test                  | Specification      | Results            |
|-----------------------|--------------------|--------------------|
| Appearance            | Pale yellow powder | Pale yellow powder |
| Loss on drying        | <3.0%              | 1.3%               |
| Purity (HPLC, 320nm)* | ≥98.0%             | 99.56%             |

\* Please find HPLC chromatography attached.

**Package:** Brown vial or HDPE Plastic Bottle

**Storage:** Cool and Dry place, protected from light, keep package airproofed when not in use.

**Expiration:** two years (2018-06-08) under conditions list above.

QC: Meng Pan

Date: 2016-06-08

QA: Lianglei Zhang

Date: 2016-06-08

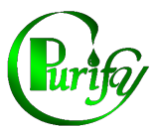

成都普瑞法科技开发有限公司

Chengdu Biopurify Phytochemicals Ltd.

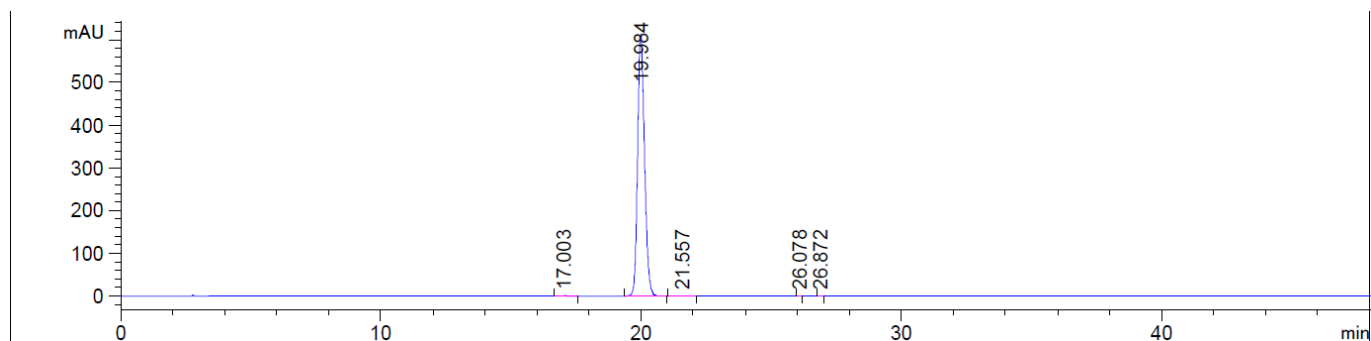

| 峰<br># | 保留时间<br>[min] | 类型 | 峰宽<br>[min] | 峰面积<br>[mAU*s] | 峰面积<br>% |
|--------|---------------|----|-------------|----------------|----------|
| 1      | 17.003        | BB | 0.2705      | 10.30797       | 0.0902   |
| 2      | 19.984        | BB | 0.2887      | 1.13778e4      | 99.5688  |
| 3      | 21.557        | BB | 0.2849      | 30.55885       | 0.2674   |
| 4      | 26.078        | BB | 0.0736      | 5.57325        | 0.0488   |
| 5      | 26.872        | BB | 0.0730      | 2.83672        | 0.0248   |

www.biopurify.com
