# Supplementary material for: 2-Phenyl-4,4,5,5-tetramethylimidazoline-1-oxyl 3-oxide Radical (PTIO•) Trapping Activity and Mechanisms of 16 Phenolic Xanthones
Source: MDPI journal article supplement (doi:10.3390/molecules23071692), 2018-07-11

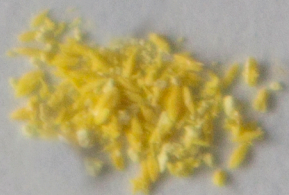

1,6,7-Trihydroxyxanthone



## CERTIFICATE OF ANALYSIS

**BBP No.:** BBP02071

**CAS No.:** 25577-04-2

**Chemical Name:** 1,6,7-Trihydroxyxanthone

**Molecular Formula:** C<sub>13</sub>H<sub>8</sub>O<sub>5</sub>

**Structure:**

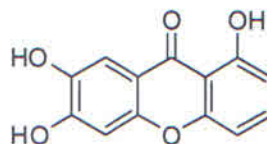

**Purity:** 98%

**Appearance:** Yellow powder

**Solvent:** Dimethyl sulfoxide, methanol

**Exact Weight:** 5.1 mg

**Storage:** Store in a dark place under the temperature of 0–4 °C

**Intended Use:** For laboratory use only

**Reference:** I. Carpenter, J Chem Soc (C), 1969, 2421-2423

**Warm Notice:** When publishing, please cite as: chemical name was purchased from BioBioPha Co., Ltd. (Kunming, China)

### Characterization Data Summary

| Analytical Test                           | Results                             |
|-------------------------------------------|-------------------------------------|
| Identification by <sup>1</sup> H-NMR      | Consistent with the above structure |
| Purity tested by HPLC, <sup>1</sup> H-NMR | 98%                                 |

**Authorized Signature:**

**Date:**

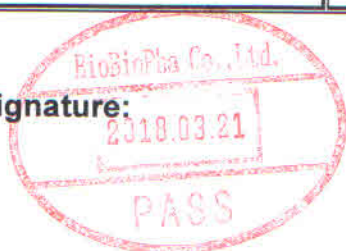

## PRODUCT QUALITY REPORT

Product Number: BBP02071

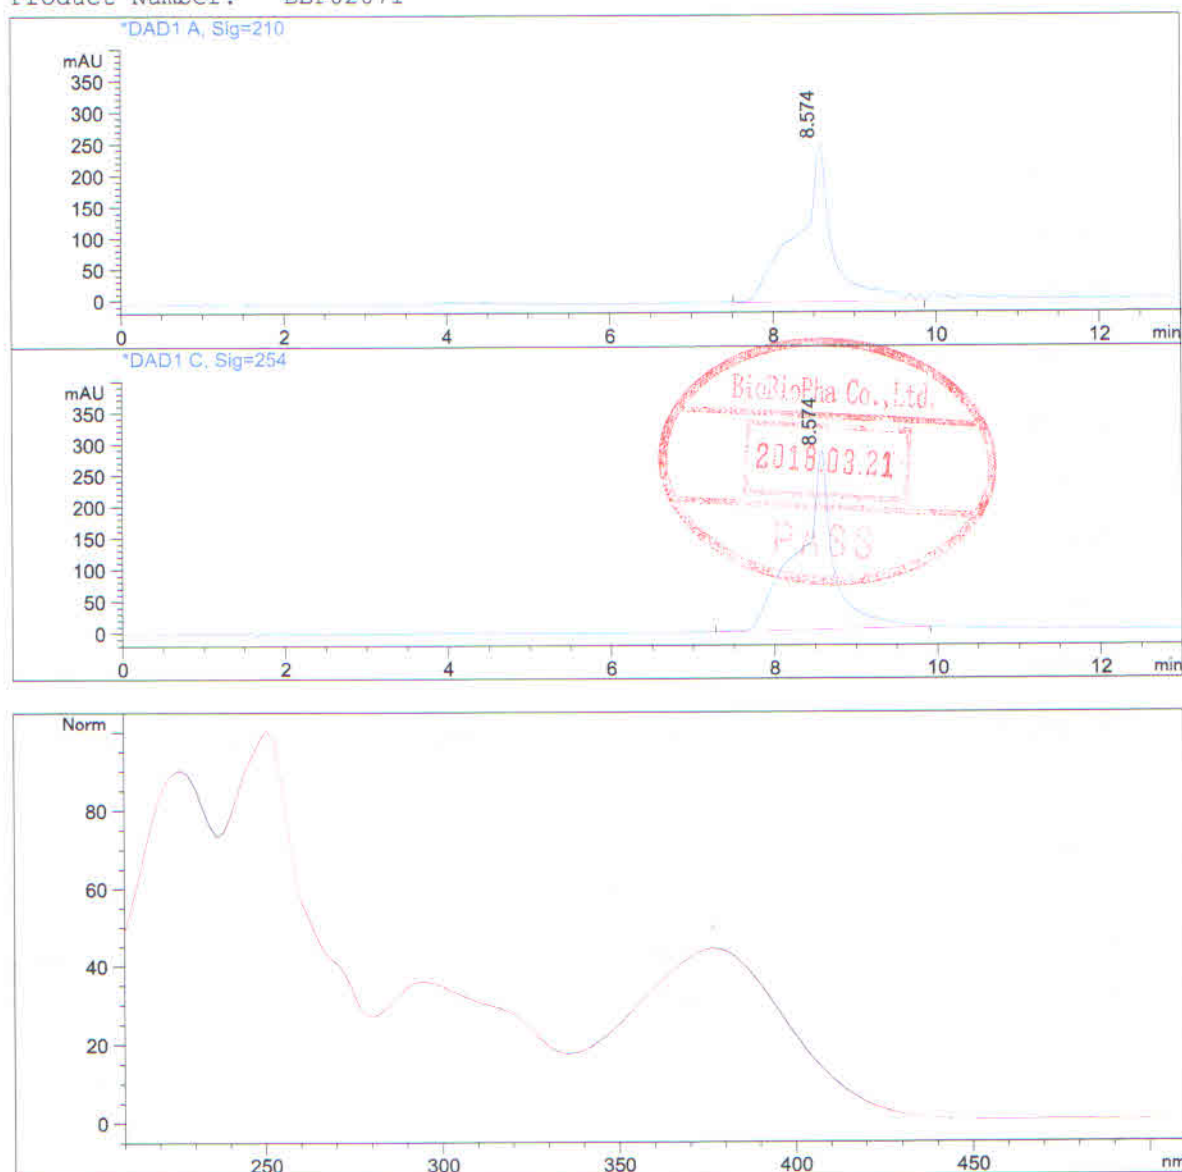

Agilent 1200 series HPLC system  
Extend-C18 column (5  $\mu$ m, 4.6  $\times$  150 mm)  
20%  $\rightarrow$  100% MeOH in H<sub>2</sub>O over 8.0 min followed by 100% MeOH to 13.0 min  
1.0 ml/min, 25°C

— 12.975

DMSO-d<sub>6</sub>, 400 MHz

7.647  
7.626  
7.605  
7.403  
7.002  
6.981  
6.904  
6.746  
6.726

— 2.490

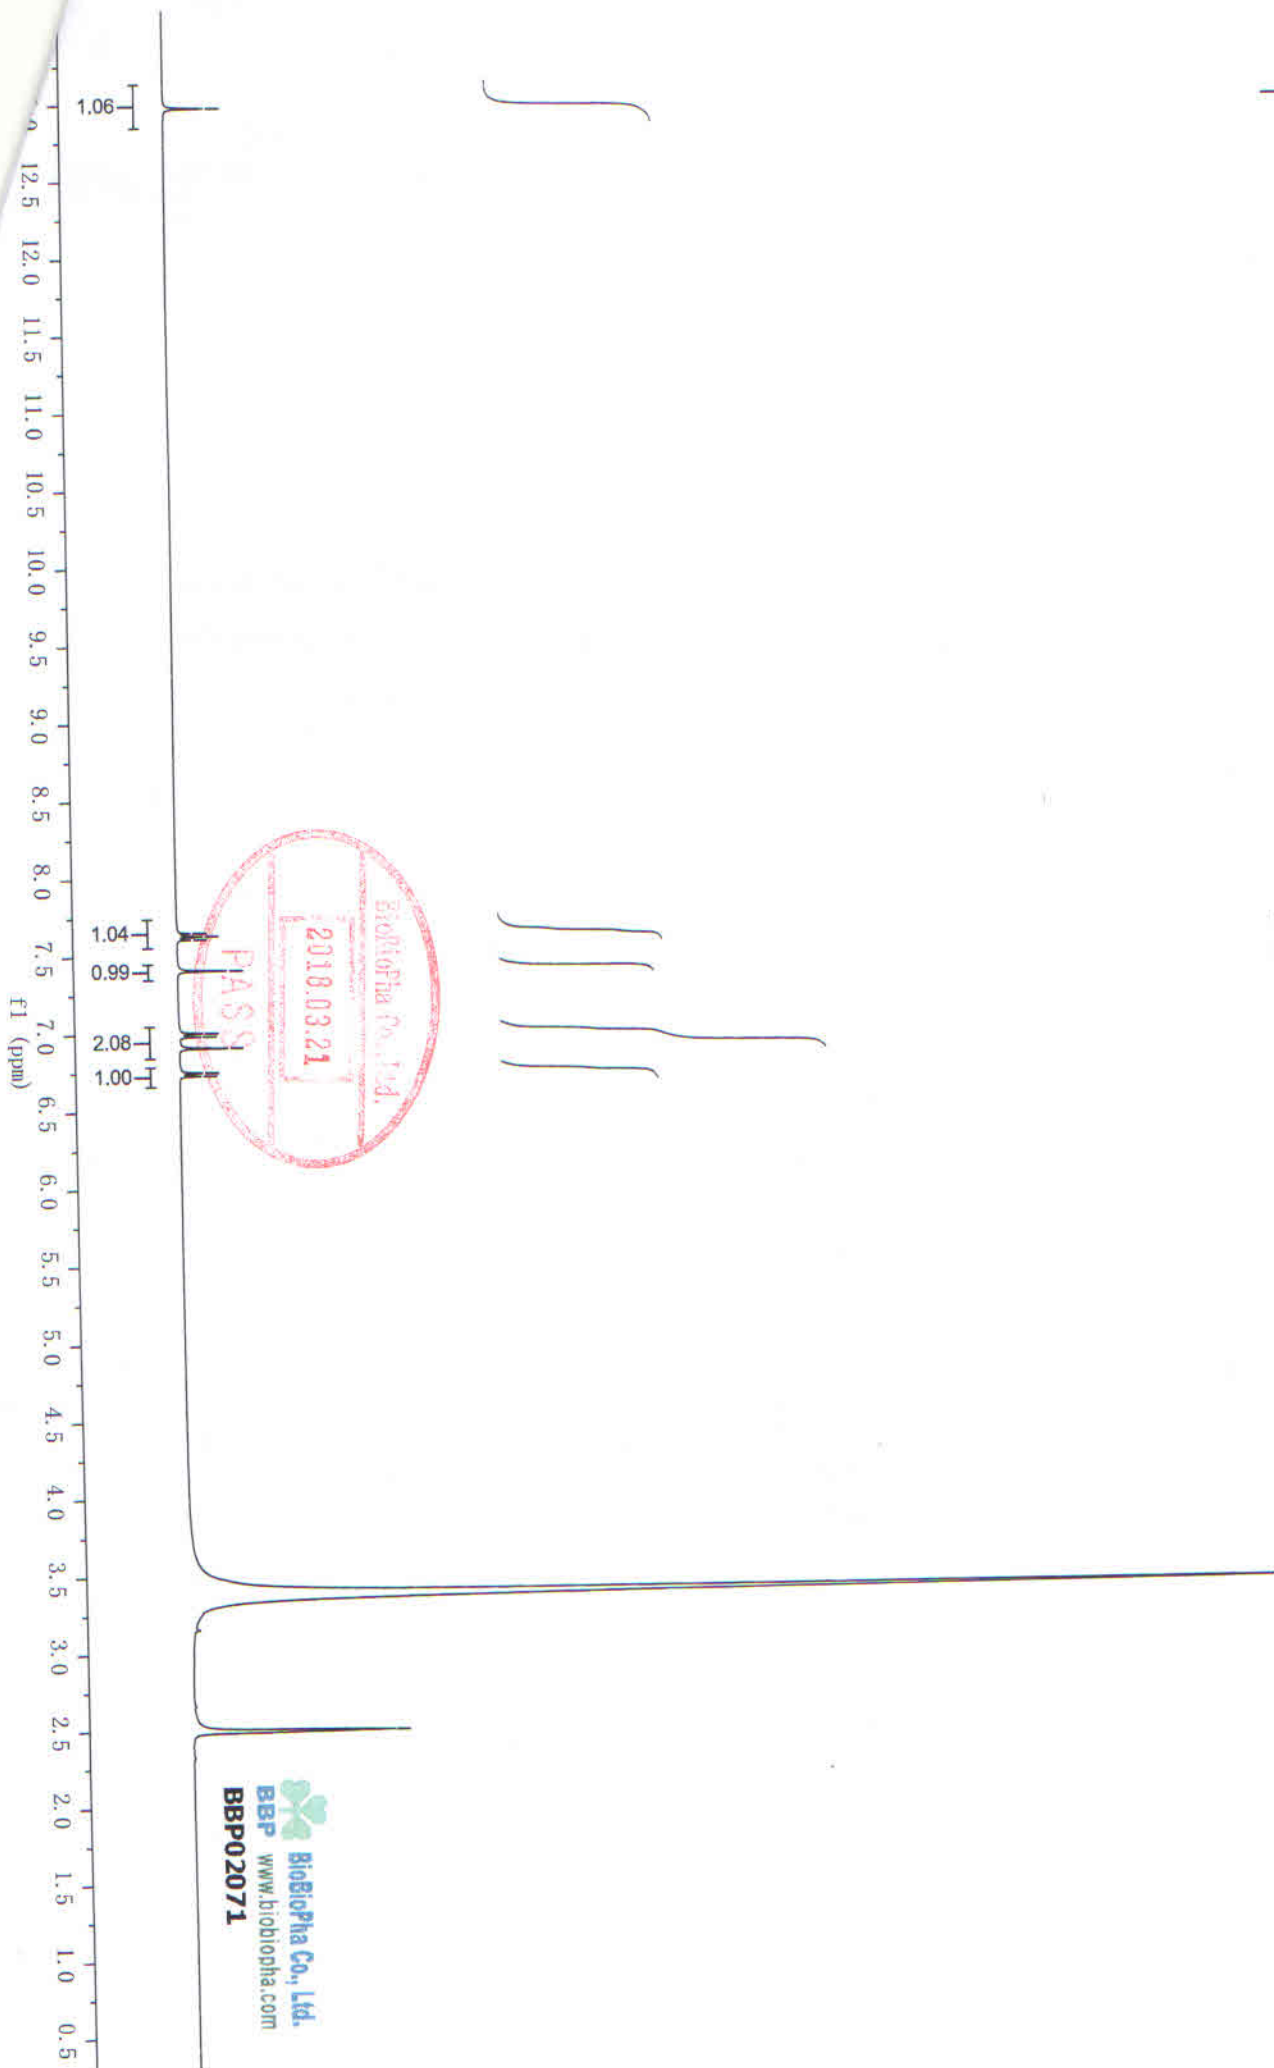

Supplement: s1 [file s1]
