# Supplementary material for: 2-Phenyl-4,4,5,5-tetramethylimidazoline-1-oxyl 3-oxide Radical (PTIO•) Trapping Activity and Mechanisms of 16 Phenolic Xanthones
Source: MDPI journal article supplement (doi:10.3390/molecules23071692), 2018-07-11
Supplement: s1 [file s1]

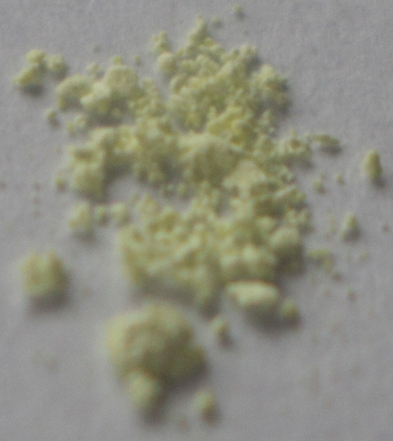

Lancerin

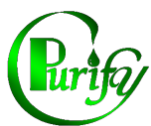

成都普瑞法科技开发有限公司  
Chengdu Biopurify Phytochemicals Ltd.

Add: No.11 Building, No. 388 Rongtaidadao CNSTP  
Wenjiang Zone, Chengdu, Sichuan, 611130 China  
TEL: 028-82633987 FAX: 028-82633165  
E-mail: biopurify@gmail.com sales@biopurify.com  
Web: www.biopurify.com

## Certificate of Analysis

**Product Name: Lancerin**

**Other Name:**

**Catalogue No.:** BP3227

**Batch No.:** PRF7061205

**Reported Date:** 2016-06-12

**CAS Number:** 81991-99-3

**Mol. Formula:** C<sub>19</sub>H<sub>18</sub>O<sub>10</sub>

**Mol. Weight:** 406.343

**Analysis Method of Purity:** HPLC-DAD

**Structure:**

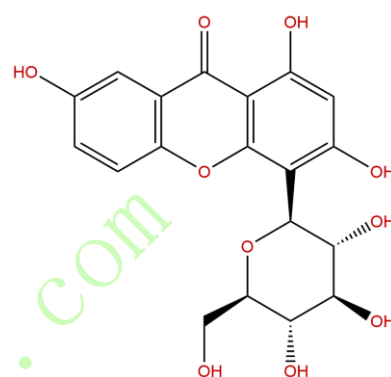

**Analytical result:**

| Test                   | Specification      | Results            |
|------------------------|--------------------|--------------------|
| Appearance             | Pale yellow powder | Pale yellow powder |
| Loss on drying         | <3.0%              | 1.3%               |
| Purity (HPLC, 320 nm)* | ≥98.0%             | 99.19%             |

\* Please find HPLC chromatography attached.

**Package:** Brown vial or HDPE Plastic Bottle

**Storage:** Cool and Dry place, protected from light, keep package airproofed when not in use.

**Expiration:** two years (2018-06-12) under conditions list above.

QC: Meng Pan

Date: 2016-06-12

QA: Lianglei Zhang

Date: 2016-06-12



成都普瑞法科技开发有限公司

Chengdu Biopurify Phytochemicals Ltd.

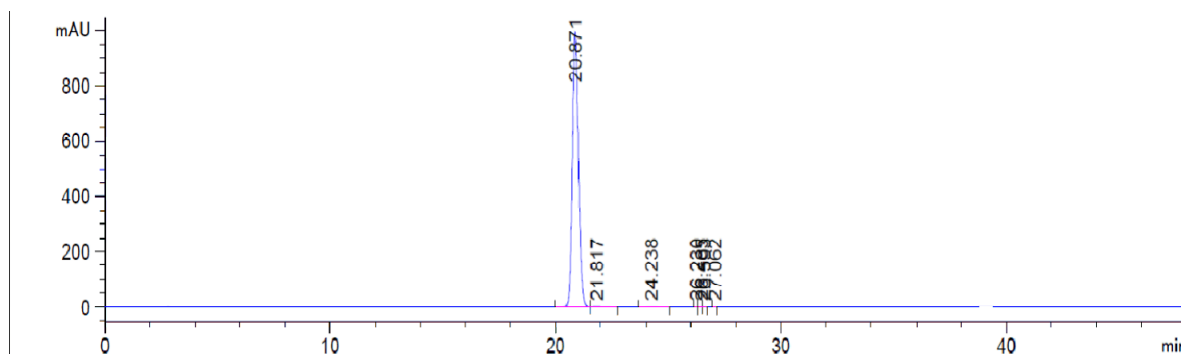

| 峰 # | 保留时间 [min] | 类型 | 峰宽 [min] | 峰面积 [mAU*s] | 峰高 [mAU]   | 峰面积 %    |
|-----|------------|----|----------|-------------|------------|----------|
| 1   | 20.871     | BV | 0.2978   | 1.88864e4   | 993.37604  | 99.1953  |
| 2   | 21.817     | VB | 0.3330   | 109.13214   | 4.80417    | 0.5732   |
| 3   | 24.238     | BB | 0.2581   | 34.23557    | 1.83164    | 0.1798   |
| 4   | 26.230     | BV | 0.0741   | 1.16161     | 2.50561e-1 | 6.101e-3 |
| 5   | 26.485     | VV | 0.0811   | 4.36628     | 8.33443e-1 | 0.0229   |
| 6   | 26.593     | VB | 0.0698   | 2.22354     | 4.82017e-1 | 0.0117   |
| 7   | 27.062     | BB | 0.0729   | 2.08749     | 4.60427e-1 | 0.0110   |

www.biopurify.com
