# Supplementary material for: 2-Phenyl-4,4,5,5-tetramethylimidazoline-1-oxyl 3-oxide Radical (PTIO•) Trapping Activity and Mechanisms of 16 Phenolic Xanthones
Source: MDPI journal article supplement (doi:10.3390/molecules23071692), 2018-07-11

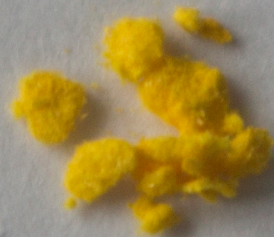

Subelliptenone G

## CERTIFICATE OF ANALYSIS

**BBP No.:** BBP00987

**CAS No.:** 162473-22-5

**Chemical Name:** Subelliptenone G

**Molecular Formula:** C<sub>13</sub>H<sub>8</sub>O<sub>5</sub>

**Structure:**

**Purity:** 97%

**Appearance:** Yellow powder

**Solvent:** Dimethyl sulfoxide, methanol

**Exact Weight:** 5.1 mg

**Storage:** Store in a dark place under the temperature of 0-4 °C

**Intended Use:** For laboratory use only

**Reference:** H. Minami, et al., Chem. Pharm. Bull., 1995, 43(2), 347-349

**Warm Notice:** When publishing, please cite as: chemical name was purchased from BioBioPha Co., Ltd. (Kunming, China)

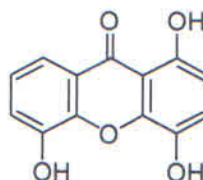

### Characterization Data Summary

| Analytical Test                           | Results                             |
|-------------------------------------------|-------------------------------------|
| Identification by <sup>1</sup> H-NMR      | Consistent with the above structure |
| Purity tested by HPLC, <sup>1</sup> H-NMR | 97%                                 |

**Authorized Signature:** 2018.03.01

**Date:**

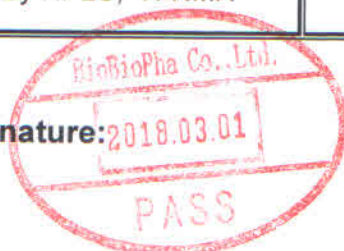



## PRODUCT QUALITY REPORT

Product Number: BBP00987

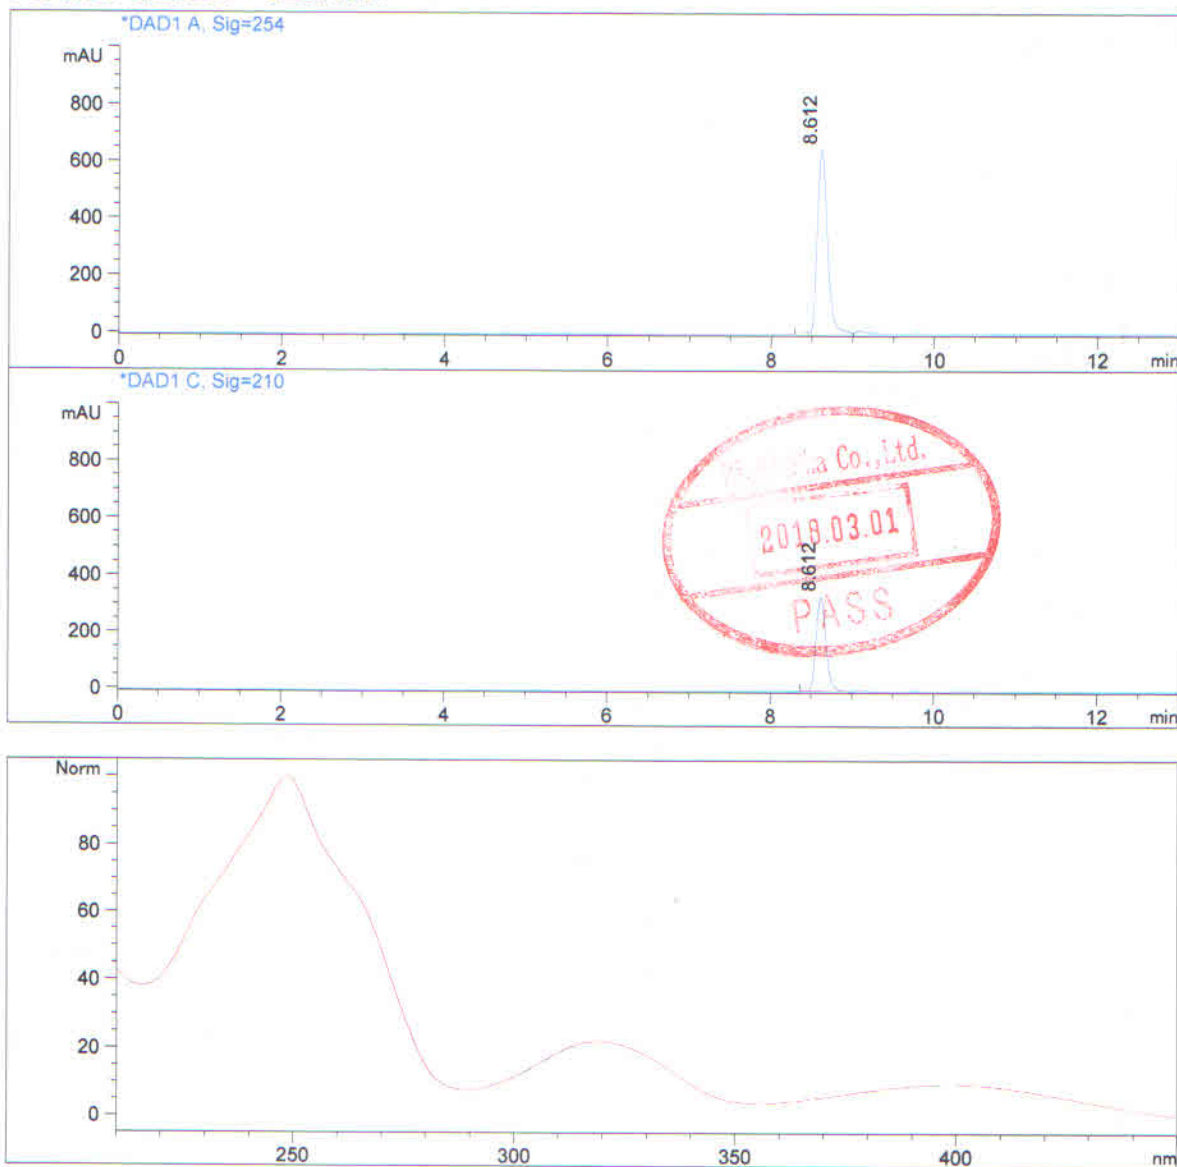

Agilent 1200 series HPLC system  
Extend-C18 column (5  $\mu$ m, 4.6  $\times$  150 mm)  
20%  $\rightarrow$  100% MeOH in H<sub>2</sub>O over 8.0 min followed by 100% MeOH to 13.0 min  
1.0 ml/min, 25°C

— 11.803

7.589  
7.585  
7.570  
7.565  
7.355  
7.351  
7.336  
7.331  
7.303  
7.283  
7.277  
7.263  
7.255  
6.665  
6.643

DMSO-*d*<sub>6</sub>, 400 MHz

— 2.490

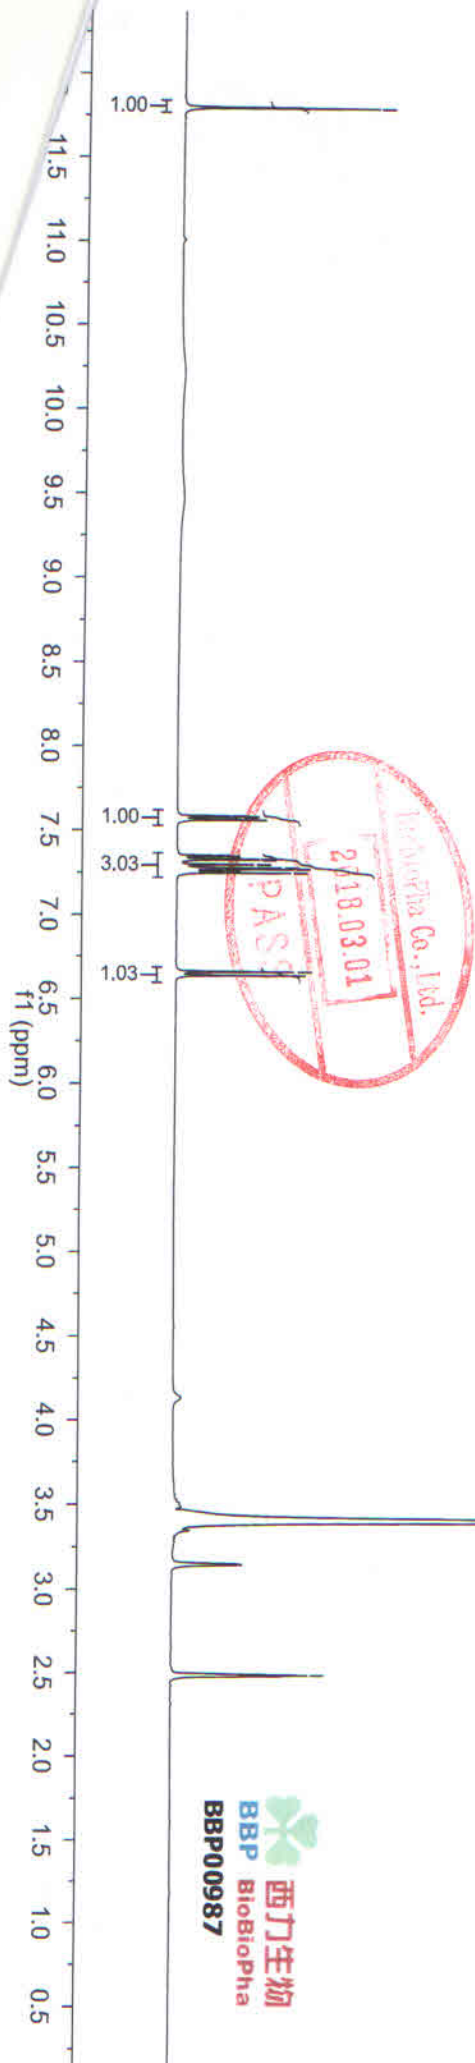

Supplement: s1 [file s1]
