# Supplementary material for: 2-Phenyl-4,4,5,5-tetramethylimidazoline-1-oxyl 3-oxide Radical (PTIO•) Trapping Activity and Mechanisms of 16 Phenolic Xanthones
Source: MDPI journal article supplement (doi:10.3390/molecules23071692), 2018-07-11
Supplement: s1 [file s1]

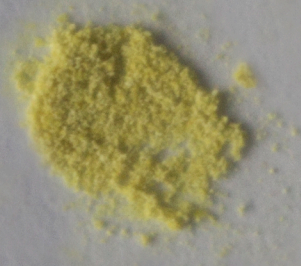

1,3,5,8-Tetrahydroxyxanthone

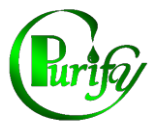

成都普瑞法科技开发有限公司  
Chengdu Biopurify Phytochemicals Ltd.

Add: No.11 Building, No. 388 Rongtaidadao CNSTP  
Wenjiang Zone, Chengdu, Sichuan, 611130 China  
TEL: 028-82633987 FAX: 028-82633165  
E-mail: biopurify@gmail.com sales@biopurify.com  
Web: www.biopurify.com

## Certificate of Analysis

**Product Name: 1,3,5,8-Tetrahydroxyxanthone**

**Other Name:**

**Structure:**

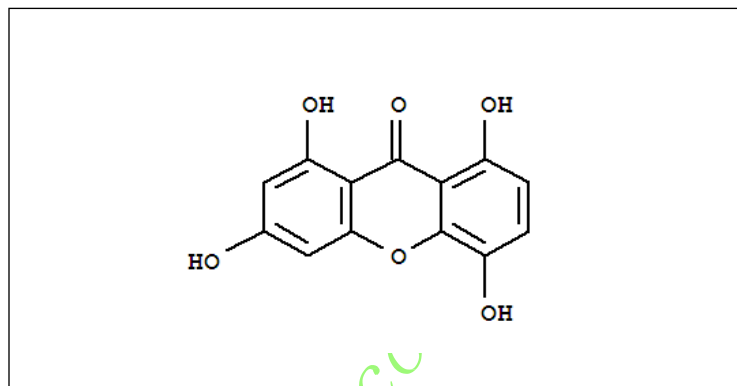

**Catalogue No.:** BP0003

**Batch No.:** 15121702

**Reported Date:** 2015-12-17

**CAS Number:** 2980-32-7

**Mol. Formula:** C<sub>13</sub>H<sub>8</sub>O<sub>6</sub>

**Mol. Weight:** 260.201

**Botanical Source:**

**Type of compound:**

**Identification Method:** Mass, NMR

**Analysis Method of Purity:** HPLC-DAD

**Analytical result:**

| Test                  | Specification      | Results            |
|-----------------------|--------------------|--------------------|
| Appearance            | Pale Yellow powder | Pale Yellow powder |
| Loss on drying        | <3.0%              | 1.3%               |
| Purity (HPLC, 254nm)* | ≥92.0%             | 99.12%             |

\* Please find HPLC chromatography attached.

**Package:** Brown vial or HDPE Plastic Bottle

**Storage:** Cool and Dry place, protected from light, keep package airproofed when not in use.

**Expiration:** two years (2017-12-17) under conditions list above.

QC: *Meng Pan*  
Date: **2015-12-17**

QA: *Lianglei Zhang*  
Date: **2015-12-17**

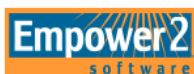

### SAMPLE INFORMATION

|                   |                              |                     |                      |
|-------------------|------------------------------|---------------------|----------------------|
| Sample Name:      | Demethylbellidifolin15121702 | Acquired By:        | panmeng              |
| Sample Type:      | Unknown                      | Sample Set Name:    |                      |
| Vial:             | 1:F,1                        | Acq. Method Set:    | Demethylbellidifolin |
| Injection #:      | 1                            | Processing Method:  | Samples              |
| Injection Volume: | 10.00 ul                     | Channel Name:       | 254.0nm              |
| Run Time:         | 20.0 Minutes                 | Proc. Chnl. Descr.: | PDA 254.0 nm         |
| Date Acquired:    | 2015-12-17 11:31:57 CST      |                     |                      |
| Date Processed:   | 2015-12-17 12:31:01 CST      |                     |                      |

### Auto-Scaled Chromatogram

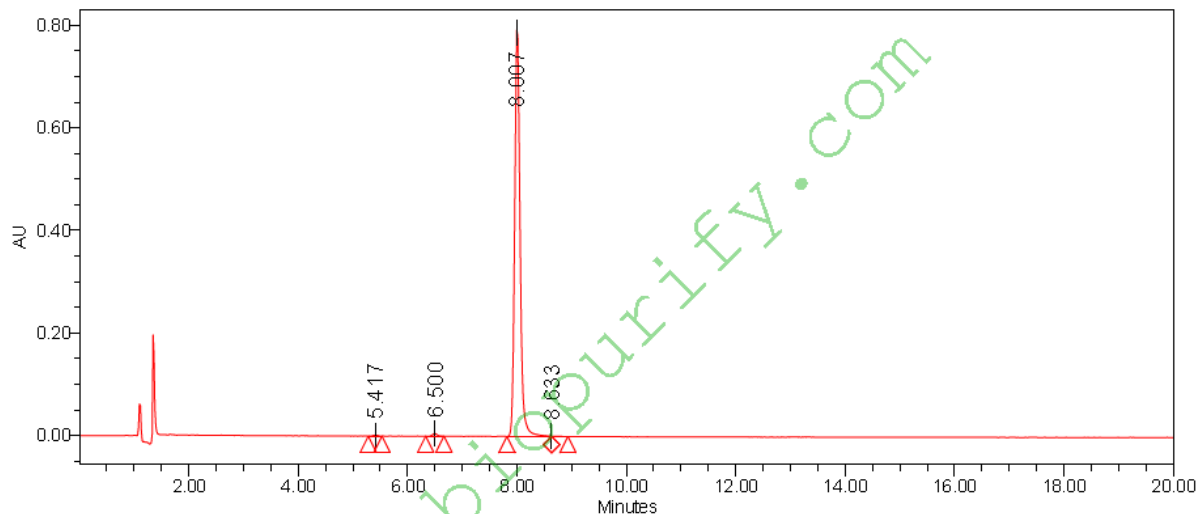

### Peak Results

|   | Name | RT    | Area    | % Area | USP Plate Count | USP Resolution |
|---|------|-------|---------|--------|-----------------|----------------|
| 1 |      | 5.417 | 11228   | 0.20   | 19251.59        |                |
| 2 |      | 6.500 | 30530   | 0.55   | 22818.36        | 6.54           |
| 3 |      | 8.007 | 5474846 | 99.12  | 32801.92        | 8.60           |
| 4 |      | 8.633 | 6787    | 0.12   |                 | 3.53           |
